## BRAIN STIMULATION DEPRESSION META-ANALYSIS

1 **Title:** Efficacy and acceptability of non-invasive brain stimulation for the treatment of adult  
2 unipolar and bipolar depression: A systematic review and meta-analysis of randomised sham-  
3 controlled trials

4

5 **Authors:** Julian Mutz<sup>1,2</sup> MSc, Daniel R. Edgcumbe<sup>3</sup> MSc, Andre R. Brunoni<sup>4,5</sup> MD PhD,  
6 Cynthia H.Y. Fu<sup>3,6</sup> MD PhD

7

### 8 **Affiliations:**

9 1. Department of Epidemiology and Biostatistics, School of Public Health, Faculty of  
10 Medicine, Imperial College London, United Kingdom

11 2. Social, Genetic and Developmental Psychiatry Centre, Institute of Psychiatry, Psychology  
12 and Neuroscience, King's College London, United Kingdom

13 3. School of Psychology, College of Applied Health and Communities, University of East  
14 London, United Kingdom

15 4. Service of Interdisciplinary Neuromodulation, Laboratory of Neurosciences (LIM-27) and  
16 National Institute of Biomarkers in Psychiatry (INBioN), Department and Institute of  
17 Psychiatry, Hospital das Clínicas HCFMUSP, Faculdade de Medicina, Universidade de  
18 Sao Paulo, Sao Paulo, SP, Brazil.

19 5. Department of Psychiatry and Psychotherapy, Ludwig-Maximilians-University, Munich,  
20 Germany.

21 6. Centre for Affective Disorders, Department of Psychological Medicine, Institute of  
22 Psychiatry, Psychology and Neuroscience, King's College London, United Kingdom

23

24 **Author for Correspondence:**

## BRAIN STIMULATION DEPRESSION META-ANALYSIS

25 Julian Mutz, Department of Epidemiology and Biostatistics, School of Public Health, Faculty  
26 of Medicine, Imperial College London, United Kingdom; Norfolk Place, London W2 1PG,  
27 United Kingdom. Email: [julian.mutz \[at\] gmail.com](mailto:julian.mutz[at]gmail.com); phone: +44(0)2075943686.

## BRAIN STIMULATION DEPRESSION META-ANALYSIS

### 28 **Abstract**

29 We examined the efficacy and acceptability of non-invasive brain stimulation in adult  
30 unipolar and bipolar depression. Randomised sham-controlled trials of transcranial direct  
31 current stimulation (tDCS), transcranial magnetic stimulation (TMS) and theta-burst  
32 stimulation (TBS), without co-initiation of another treatment, were included. We analysed  
33 effects on response, remission, all-cause discontinuation rates and continuous depression  
34 severity measures. Fifty-six studies met our criteria for inclusion ( $N = 3,058$ , mean age =  
35 44.96 years, 61.73% female). Response rates demonstrated efficacy of high-frequency rTMS  
36 over the left DLPFC (OR = 3.75, 95% CI [2.44; 5.75]), right-sided low-frequency rTMS (OR  
37 = 7.44, 95%CI [2.06; 26.83]) bilateral rTMS (OR = 3.68,95%CI [1.66; 8.13]), deep TMS (OR  
38 = 1.69, 95%CI [1.003; 2.85]), intermittent TBS (OR = 4.70, 95%CI [1.14; 19.38]) and tDCS  
39 (OR = 4.17, 95% CI [2.25; 7.74]); but not for continuous TBS, bilateral TBS or synchronised  
40 TMS. There were no differences in all-cause discontinuation rates. The strongest evidence  
41 was for high-frequency rTMS over the left DLPFC. Intermittent TBS provides an advance in  
42 terms of reduced treatment duration. tDCS is a potential treatment for non-treatment resistant  
43 depression. To date, there is not sufficient published data available to draw firm conclusions  
44 about the efficacy and acceptability of TBS and sTMS.

45

46 *Keywords:* transcranial magnetic stimulation, theta burst stimulation, transcranial direct  
47 current stimulation, depression, meta-analysis, brain stimulation, systematic review

## BRAIN STIMULATION DEPRESSION META-ANALYSIS

### 48 **Highlights**

- 49       • Response, remission, all-cause discontinuation rates and continuous post-treatment  
50       depression scores were examined
- 51       • Several non-invasive brain stimulation treatments seem efficacious across different  
52       outcome metrics
- 53       • All-cause discontinuation rates indicate no differences between sham and active  
54       treatment

## BRAIN STIMULATION DEPRESSION META-ANALYSIS

### 55 **Introduction**

56 Major depression is prevalent<sup>1</sup> and associated with considerable disease burden<sup>2</sup>. Its course is  
57 often recurrent and may become chronic with relapse rates within one year of remission  
58 ranging from 35% to 80%<sup>3,4</sup>. The most common treatments are pharmacological and  
59 psychological therapies. Yet, even with a full course of treatment, at least one third of patients  
60 fail to achieve remission<sup>5</sup>. Non-invasive neurostimulation therapies, such as transcranial  
61 magnetic stimulation (TMS) and transcranial electrical stimulation (tES), offer a potential  
62 alternative or add-on treatment strategy.

63  
64 TMS was originally introduced as a tool for investigating and mapping cortical functions and  
65 connectivity<sup>6</sup>. TMS utilises intense, rapidly-changing electromagnetic fields generated by a  
66 coil of wire near the scalp and allows for a mostly undistorted induction of an electrical  
67 current to alter neural activity in relatively focal, superficial areas of the brain. Standard TMS  
68 involves single or paired pulses, while repetitive transcranial magnetic stimulation (rTMS)  
69 involves the delivery of repeated pulses which enable the prolonged modulation of neural  
70 activity. Depending on the stimulation frequency, rTMS can increase or decrease cortical  
71 excitability. The prevailing hypothesis is that the aftereffects of high-frequency (usually 10Hz  
72 or higher) stimulation are excitatory while those of low-frequency ( $\leq 1$ Hz) stimulation are  
73 inhibitory<sup>7</sup>.

74  
75 The rationale for using rTMS to treat depressive illness comes from clinical symptomatology  
76 and neuroanatomy as well as neuroimaging studies indicating functional impairments in  
77 prefrontal cortical and limbic regions<sup>8</sup>. In 2008, the US Food and Drug Administration (FDA)  
78 approved the first rTMS device for the treatment major depressive disorder (MDD) in which  
79 there was poor response to at least one pharmacological agent in the current episode<sup>9</sup>, and its  
80 clinical utilisation has increased since<sup>10</sup>.

## BRAIN STIMULATION DEPRESSION META-ANALYSIS

81  
82 As stimulation at high frequencies can be uncomfortable during the initial stimulation period,  
83 low-frequency rTMS may minimise the occurrence of undesired side effects, namely  
84 headaches and scalp discomfort, and may be associated with fewer adverse events, for  
85 instance by lowering the risk for developing seizures<sup>11</sup>.

86  
87 Bilateral applications of rTMS have also been developed: simultaneous stimulation over the  
88 left and right DLPFC (rDLPFC) or stimulation over one side followed by stimulation of the  
89 other side. These applications were hypothesised to be potentially additive or synergistic to  
90 reinstate any imbalance in prefrontal neural activity<sup>12</sup>. Moreover, there may be a selective  
91 unilateral response and the likelihood for a clinical response may increase by providing both  
92 types of stimulation<sup>13</sup>.

93  
94 Technical and methodological efforts to improve the antidepressant efficacy of TMS have led  
95 to several alternative treatment protocols. Deep TMS (dTMS) was FDA-approved in 2013,  
96 which is able to stimulate larger brain volumes and deeper structures<sup>14</sup> that could be more  
97 directly relevant in the pathophysiology of depression (e.g., reward-mediating pathways and  
98 areas connected to the subgenual cingulate cortex)<sup>8,15,16</sup>.

99  
100 Another recent modification is theta burst stimulation (TBS)<sup>17</sup>, which is a patterned form of  
101 TMS pulse delivery that utilises high and low frequencies in the same stimulus train. TBS  
102 delivers bursts of three at a high frequency (50Hz) with an inter-burst interval of 5Hz in the  
103 theta range at 5Hz. Two different protocols are utilised: continuous theta burst stimulation  
104 (cTBS), which delivers 300 or 600 pulses without interruption, and intermittent theta burst  
105 stimulation (iTBS), which delivers 30 pulses every 10 seconds for a duration of 190 seconds,  
106 totalling 600 pulses<sup>18</sup>. It is suggested that cTBS reduces cortical excitability while iTBS

## BRAIN STIMULATION DEPRESSION META-ANALYSIS

107 increases it, mimicking the processes of long-term potentiation and long-term depression,  
108 respectively<sup>17</sup>. Notably, there is some debate as to whether prolonged stimulation periods  
109 reverse the hypothesised effects of TBS<sup>19</sup>, while there is also support for a dose-response  
110 relationship for iTBS<sup>20</sup>.

111  
112 The main advantages of TBS are its reduced administration time, which is typically less than  
113 five minutes as opposed to 20–45 minutes for conventional rTMS, and the lower intensity  
114 needed to produce lasting neurophysiological effects as TBS is typically administered at 80%  
115 of the resting motor threshold (rMT) and might be more comfortable than stimulation at  
116 higher intensities typically used with standard rTMS.

117  
118 Synchronised TMS refers to magnetic low-field synchronised stimulation (sTMS), a new  
119 treatment paradigm that involves rotating spherical rare-earth (neodymium) magnets  
120 positioned sagittally along the midline of the scalp, which deliver stimulation synchronised to  
121 an individual's alpha frequency<sup>21</sup>. The magnets are positioned to provide a global magnetic  
122 field distributed broadly across the midline cortical surface (one magnet over the frontal polar  
123 region, one magnet over the top of the head, and one magnet over the parietal region). The  
124 rationale for sTMS synchronised to an individual's alpha frequency is the observation that  
125 one mechanism of action of rTMS is the entrainment of oscillatory activity to the  
126 programmed frequency of stimulation, thereby resetting thalamo-cortical oscillators and  
127 restoring normal endogenous oscillatory activity<sup>22</sup>. This modification of TMS may be  
128 associated with fewer treatment-emergent adverse and side effects because it does not cause  
129 neural depolarisation. It also uses less energy than conventional rTMS as it utilises sinusoidal  
130 instead of pulsed magnetic fields, which require less than 1% of the energy needed for  
131 conventional rTMS and may thus be less expensive.

132

## BRAIN STIMULATION DEPRESSION META-ANALYSIS

133 Access and costs are among the major impediments to a more widespread use of rTMS,  
134 although costs may be lower for TBS and sTMS. A less expensive technique is transcranial  
135 electrical stimulation (tES). Its most commonly used protocol, transcranial direct current  
136 stimulation (tDCS), was reappraised as a tool in research through the work of Priori et al.<sup>23</sup>  
137 and Nitsche and Paulus<sup>24</sup>. tDCS involves the application of a low-amplitude electrical direct  
138 current through surface scalp electrodes to superficial areas of the brain. While it does not  
139 directly trigger action potentials, it modulates cortical excitability by shifting the neural  
140 membrane resting potential and these effects can outlast the electrical stimulation period<sup>25</sup>.  
141 The direction of such excitability changes may depend on the polarity of the stimulation:  
142 anodal stimulation is hypothesised to cause depolarisation and an increase in neural  
143 excitability, whereas cathodal stimulation causes hyperpolarisation and a decrease in cortical  
144 excitability<sup>26,27</sup>.

145  
146 The advantages of tDCS compared to TMS include its ease of administration, being much less  
147 expensive, its more benign side effect profile, and its portability which could potentially be  
148 used in the home environment<sup>28</sup>.

149  
150 We sought to perform a systematic review and meta-analysis of the antidepressant efficacy  
151 and acceptability of non-invasive neuromodulation in treating a current depressive episode in  
152 unipolar and bipolar depression from randomised sham-controlled trials. The only study to  
153 date that evaluated the efficacy of a range of rTMS techniques is Brunoni et al.'s network  
154 meta-analysis<sup>29</sup>. However, the analysis had included trials that had co-initiated other  
155 treatments (e.g. sleep deprivation and TMS); trials which had not included a sham treatment;  
156 had not separated the TBS modifications; and had not included any age-related exclusion  
157 criteria. Also, tDCS trials were not included in that meta-analysis. We sought to address these  
158 limitations by including only trials with randomised allocation to active or sham treatments,



## BRAIN STIMULATION DEPRESSION META-ANALYSIS

159 excluding studies which had co-initiated another treatment, and limiting our sample to the  
160 adult age range as geriatric depression may impact on efficacy.

161

## 162 **Materials and Methods**

### 163 **Search strategy and selection criteria**

164 We followed the Preferred Reporting Items for Systematic Reviews and Meta-Analyses  
165 (PRISMA) guidelines<sup>30</sup>. A systematic search of the Embase, Medline, and PsycINFO  
166 databases was performed from the first date available to 1st May 2018 (Figure 1). The  
167 following search terms were used: (bipolar disorder OR bipolar depression OR major  
168 depression OR unipolar depression OR unipolar disorder) AND (transcranial direct current  
169 stimulation OR tDCS OR transcranial magnetic stimulation OR TMS OR theta burst  
170 stimulation OR TBS OR sTMS OR dTMS), limiting searches to studies in humans and  
171 English-language publications. Reference lists of included papers and of recent systematic  
172 reviews and meta-analyses (Supplementary Material 1) were screened for further studies. This  
173 study has not been previously registered.

174

175 Inclusion criteria were: 1) adults aged 18 – 70 years; 2) DSM or ICD diagnosis of MDD or  
176 bipolar disorder currently in a major depressive episode; 3) randomised sham-controlled  
177 trials, which utilised a parallel-group or cross-over design; 4) clinician-administered  
178 depression rating scale, Hamilton Depression Rating Scale (HDRS)<sup>31</sup> or Montgomery-Åsberg  
179 Depression Rating Scale (MADRS)<sup>32</sup>.

180

181 Exclusion criteria were: 1) primary diagnoses other than MDD or bipolar depression; 2)  
182 studies limited to a specific subtype of depression (e.g., postpartum depression or vascular  
183 depression) or in which a major depressive episode was a secondary diagnosis (e.g.,

## BRAIN STIMULATION DEPRESSION META-ANALYSIS

184 fibromyalgia and major depression); 3) co-initiation of any other form of treatment, such as  
185 pharmacotherapy or cognitive control training.

186

### 187 **Data analysis**

188 The following sample characteristics were extracted: sex, age, hospitalisation status, whether  
189 patients with psychotic symptoms were excluded from the study, diagnosis, treatment  
190 strategy, and treatment resistance.

191

192 The following treatment-related parameters were extracted. For TMS: type of coil and sham  
193 procedure, coil location, stimulation frequency (Hz) for each site, stimulation intensity  
194 (percentage of the rMT), total number of pulses delivered, and number of treatment sessions.

195 For TBS: data on the treatment protocol (iTBS, cTBS or bilateral TBS) were also recorded.

196 For tDCS: location of the anode and cathode, electrode size (cm<sup>2</sup>), current intensity (mA) and  
197 density (mA/cm<sup>2</sup>), session duration, number of sessions, and duration of active stimulation in  
198 the sham condition.

199

200 The primary outcome measure was clinical response, defined as a  $\geq 50\%$  reduction in  
201 symptom scores at the primary study endpoint. Remission rates were the secondary outcome  
202 measure based on the definition provided by each study. If response or remission rates were  
203 reported for both HDRS and MADRS, data for the HDRS were selected to facilitate  
204 comparability between trials. If data for multiple versions of the HDRS were reported, the  
205 original 17-item version was selected. We also extracted baseline and post-treatment  
206 depression severity scores; the latter constituted our tertiary outcome measure. If available,  
207 the intention-to-treat (ITT) or modified intention-to-treat (mITT) data were preferred over  
208 data based only on completers. For cross-over trials, only data from the initial randomisation  
209 were used to avoid carry-over effects. Data presented in figures were extracted with

## BRAIN STIMULATION DEPRESSION META-ANALYSIS

210 WebPlotDigitizer (<http://arohatgi.info/WebPlotDigitizer/app/>). All-cause discontinuation rates  
211 were recorded separately for active and sham groups and were treated as a primary outcome  
212 measure of acceptability.

213  
214 Data that could not be directly retrieved from the original publications were requested from  
215 the authors or searched for in previous systematic reviews and meta-analyses. For trials with  
216 more than two groups that could not be included as separate treatment comparisons, we  
217 combined groups to create single pair-wise comparisons.

218  
219 For dichotomous outcome data, odds ratios (Mantel-Haenszel method) were used as an index  
220 of effect size. We also computed Hedge's  $g$  to estimate the effect sizes for continuous post-  
221 treatment depression scores. A random-effects model was chosen as it was assumed that the  
222 underlying true effect size would vary between studies. A random-effects model provides  
223 wider confidence intervals than a fixed-effects model if there is significant heterogeneity  
224 among studies and thus tends to be more conservative in estimating summary effect sizes.

225  
226 Contour-enhanced funnel plots<sup>33</sup> were visually inspected to assess whether potential funnel  
227 asymmetry is likely to be due to statistical significance-based publication bias.

228  
229 Heterogeneity between studies was assessed with the  $Q_T$  statistic, which estimates whether the  
230 variance of effect sizes is greater than what would be expected due to sampling error. A  $p$   
231 value smaller than .01 provides an indication for significant heterogeneity<sup>34</sup>. The  $I^2$  statistic  
232 was computed for each analysis to provide a descriptive measure of inconsistency across the  
233 results of individual trials included in our analyses. It provides an indication of what  
234 percentage of the observed variance in effect sizes reflects real differences in effect sizes as

## BRAIN STIMULATION DEPRESSION META-ANALYSIS

235 opposed to sampling error. Higgins et al.<sup>35</sup> suggested that 25%, 50%, and 75% represent little,  
236 moderate, and high heterogeneity, respectively.

237

238 Where sufficient data were available, we conducted subgroup analyses to examine potential  
239 differences in antidepressant efficacy by clinical and study characteristics including diagnosis,  
240 whether the trial excluded patients with psychotic symptoms, hospitalization status and  
241 treatment resistance.

242

243 Analyses were conducted using the ‘meta’ package<sup>36</sup> for RStudio (Version 0.98.932) and  
244 STATA (Version 13.1; StataCorp, 2013) was used for data processing.

245

246 The Cochrane tool for assessing risk of bias in randomised trials<sup>37</sup> was used to evaluate  
247 included studies. Each trial received a score of low, high, or unclear risk of bias for each of  
248 the potential sources of bias. Two raters independently conducted the assessment of risk of  
249 bias.

250

## 251 **Results**

### 252 **Overview**

253 Fifty-six RCTs, consisting of 131 treatment arms met our criteria for inclusion (Figure 1,  
254 Supplementary Material 2). Overall, 66 treatment comparisons were included, total  $N = 3,058$   
255 patients (mean age = 44.96 years, 61.73% female) of whom  $n = 1,598$  were randomised to  
256 active and  $n = 1,460$  to sham treatments (Tables 1-4).

257

258 Visual inspection of the contour-enhanced funnel plots did not suggest small study effects  
259 (Figure 2; Supplementary Material 3). However, due to the small number of studies for

## BRAIN STIMULATION DEPRESSION META-ANALYSIS

260 treatment modalities other than left-sided high-frequency rTMS and tDCS, these need to be  
261 interpreted with caution. The results of our risk of bias assessment are presented in  
262 Supplementary Material 4.

263

### 264 **Response and remission rates**

265 Sixty-two comparisons of experimental and sham treatment arms met the inclusion criteria for  
266 the meta-analysis of response rates (Table 5; Figure 3), and 50 treatment comparisons for the  
267 meta-analysis of remission rates (Table 6; Figure 4).

268

269 High-frequency rTMS over the left DLPFC (lDLPFC) was associated with improved rates of  
270 response as well as remission in comparison with sham treatment. The odds ratio of response  
271 was OR = 3.75 compared to sham ( $k = 32$ , 95% CI [2.44; 5.75]). There was little evidence  
272 that the heterogeneity between trials exceeded that expected by chance ( $I^2 = 26.1\%$ ;  $Q_{31} =$   
273  $41.96$ ,  $p = .09$ ). Sensitivity analyses suggested similar effect sizes in trials that had recruited  
274 patients with unipolar depression only and those that had recruited both patients with unipolar  
275 and bipolar depression (Supplementary Figure 3a). Only one pilot study<sup>38</sup> had recruited  
276 patients with bipolar depression only, but provided no support for antidepressant efficacy (OR  
277 = 1.14, 95% CI [0.21; 6.37]). Response rates were greater in trials that (i) excluded patients  
278 with psychotic features, (ii) recruited outpatients only, and (iii) recruited either treatment  
279 resistant patients only or both treatment resistant patients and those that were not treatment  
280 resistant (Supplementary Figures 3b-3d).

281

282 The odds of achieving remission were over twice that of sham ( $k = 26$ , OR = 2.51, 95% CI  
283 [1.62; 3.89]). There was no evidence for significant heterogeneity ( $I^2 = 1.4\%$ ;  $Q_{25} = 22.35$ ,  $p =$   
284  $.44$ ). Sensitivity analyses for remission rates were in line with those for response rates,  
285 although we did not find left-sided high-frequency rTMS to be effective in samples that had

## BRAIN STIMULATION DEPRESSION META-ANALYSIS

286 recruited both treatment resistant and non-treatment resistant patients (Supplementary Figures  
287 6a-6d).

288

289 Low-frequency rTMS over the rDLPFC was also associated with significantly greater  
290 response and remission rates than sham stimulation. There was a sevenfold improvement in  
291 response rates compared to sham ( $k = 3$ , OR = 7.44 (95% CI [2.06; 26.83]), with no indication  
292 for significant heterogeneity between trials ( $I^2 = 0.0\%$ ;  $Q_2 = 1.59$ ,  $p = .45$ ). No sensitivity  
293 analyses were conducted due to the small number of treatment comparisons.

294

295 The odds of remission were greater than those of sham ( $k = 2$ , OR = 14.10 (95% CI [2.79;  
296 71.42]). Heterogeneity between trials was not greater than expected due to sampling error ( $I^2$   
297 = 0.0%;  $Q_1 = 0.50$ ,  $p = .48$ ). No sensitivity analyses were conducted due to the small number  
298 of treatment comparisons.

299

300 Low-frequency rTMS over the IDLPFC was not associated with any significant  
301 improvements in rates of response or remission. There were no significant differences in  
302 response rates compared to sham ( $k = 3$ , OR = 1.41, 95% CI [0.15; 12.88]). The heterogeneity  
303 between trials did not exceed that expected by chance ( $I^2 = 0.0\%$ ;  $Q_2 = 0.14$ ,  $p = .93$ ), and no  
304 sensitivity analyses were conducted due to the small number of treatment comparisons. There  
305 were no significant differences in remission rates compared to sham ( $k = 3$ , OR = 0.86, 95%  
306 CI [0.08; 9.11]). The variance in effect sizes between trials was no greater than expected due  
307 to sampling error ( $I^2 = 0.0\%$ ;  $Q_2 = 0.03$ ,  $p = .98$ ). No sensitivity analyses were conducted due  
308 to the small number of treatment comparisons.

309

310 Bilateral rTMS was associated with significant improvement in response but not remission  
311 rates compared to sham. There was a significant improvement in response rates compared to

## BRAIN STIMULATION DEPRESSION META-ANALYSIS

312 sham ( $k = 6$ , OR = 3.68 (95% CI [1.66; 8.13]), and the variance in effect sizes between trials  
313 did not exceed that expected due to sampling error ( $I^2 = 0.0\%$ ;  $Q_5 = 3.45$ ,  $p = .63$ ). Sensitivity  
314 analyses suggested subgroup differences according to whether trials had excluded psychotic  
315 patients or had recruited patients with diagnosis of MDD only, bipolar depression only, or  
316 both MDD and bipolar depression (Supplementary Figures 4a,4b). We found no evidence for a  
317 significant improvement in rates of remission associated with bilateral TMS compared to  
318 sham ( $k = 5$ , OR = 3.05, 95% CI [0.87; 10.67]). There was no evidence for significant  
319 heterogeneity between trials ( $I^2 = 10.7\%$ ;  $Q_4 = 4.48$ ,  $p = .34$ ), and sensitivity analyses  
320 suggested no differences according to any patient characteristics tested (Supplementary  
321 Figures 7a,7b).

322

323 There were significant improvements in both response and remission rates for dTMS  
324 compared to sham. The response rates were marginally higher while statistically significant  
325 for dTMS relative to sham ( $k = 2$ , OR = 1.69, 95% CI [1.003; 2.85]). The variance in effect  
326 sizes between trials did not exceed that expected due to sampling error ( $I^2 = 0.0\%$ ;  $Q_1 = 0.97$ ,  
327  $p = .33$ ). No sensitivity analyses were conducted due to the small number of treatment  
328 comparisons. The remission rates were greater for dTMS compared to sham ( $k = 2$ , OR =  
329 2.24, 95% CI [1.24; 4.06]). There was no evidence for significant heterogeneity between trials  
330 ( $I^2 = 0.0\%$ ;  $Q_1 = 0.02$ ,  $p = 0.88$ ), and no sensitivity analyses were conducted due to the small  
331 number of treatment comparisons.

332

333 Neither response nor remission rates for sTMS were significantly higher than for sham. There  
334 was no evidence for increased response rates compared to sham ( $k = 2$ , OR = 2.71, 95% CI  
335 [0.44; 16.86]). There was significant heterogeneity between these two studies ( $I^2 = 75.9\%$ ;  
336  $Q_1 = 4.15$ ,  $p = .04$ ). No sensitivity analyses were conducted due to the small number of  
337 treatment comparisons. There were also no significant improvements in remission rates for

## BRAIN STIMULATION DEPRESSION META-ANALYSIS

338 sTMS compared to sham ( $k = 2$ , OR = 2.51 (95% CI [0.23; 26.76])). There was evidence for  
339 significant heterogeneity between the two studies though ( $I^2 = 75.7\%$ ;  $Q_1 = 4.12$ ,  $p = .04$ ). No  
340 sensitivity analyses were conducted due to the small number of treatment comparisons.

341  
342 iTBS over the IDLPFC was associated with a fivefold improvement in response rates  
343 compared to sham ( $k = 2$ , OR = 4.70 (95% CI [1.14; 19.38])). The heterogeneity between trials  
344 did not exceed that expected by chance ( $I^2 = 0.0\%$ ;  $Q_1 = 0.02$ ,  $p = .89$ ). No sensitivity  
345 analyses were conducted due to the small number of treatment comparisons. For only one  
346 trial<sup>39</sup> was data on remission rates for iTBS available, with no evidence for antidepressant  
347 efficacy compared to sham.

348  
349 Neither cTBS over the rDLPFC nor bilateral TBS were statistically different from sham in  
350 terms of response rates ( $k = 1$ , OR = 1.63, 95% CI [0.23; 11.46] and  $k = 2$ , OR = 4.28, 95% CI  
351 [0.54; 34.27])). For bilateral TBS there was evidence that the variance in effect sizes between  
352 studies was greater than what would be expected due to sampling error ( $I^2 = 65.7\%$ ;  $Q_1 =$   
353  $2.91$ ,  $p = .09$ ). No sensitivity analyses were conducted due to the small number of treatment  
354 comparisons. The only trial of bilateral TBS for which remission rates were available<sup>40</sup> found  
355 no evidence for its antidepressant efficacy compared to sham. No remission rates were  
356 available for cTBS.

357  
358 tDCS was associated with significant improvement in both response and remission rates in  
359 comparison to sham stimulation. There was a significant improvement in response rates  
360 relative to sham ( $k = 9$ , OR = 4.17, 95% CI [2.25; 7.74])). There was little evidence for  
361 significant heterogeneity between studies ( $I^2 = 26.2\%$ ;  $Q_8 = 10.83$ ,  $p = .21$ ) and sensitivity  
362 analyses suggested tDCS to be effective only in patients with non-treatment resistant



## BRAIN STIMULATION DEPRESSION META-ANALYSIS

363 depression and in trials that had recruited patients with both treatment resistant and non-  
364 treatment resistant depression (Supplementary Figure 5).

365  
366 The analysis of remission rates showed a statistically significant advantage of tDCS compared  
367 to sham ( $k = 8$ , OR = 2.88, 95% CI [1.65; 5.04]). There was no indication for significant  
368 heterogeneity between trials ( $I^2 = 0.0\%$ ;  $Q_7 = 6.32$ ,  $p = .50$ ), and sensitivity analyses found  
369 that only trials that had recruited patients with both treatment resistant and non-treatment  
370 resistant depression provided evidence for antidepressant efficacy (Supplementary Figure 8).

371  
372 **Effects on continuous measures**

373 Forty-six treatment comparisons reported post-intervention continuous depression scores.  
374 There was evidence for the antidepressant efficacy of high-frequency rTMS over the IDLPFC  
375 compared to sham ( $k = 29$ , Hedge's  $g = -0.72$ , 95% CI [-0.99; -0.46]), dTMS compared to  
376 sham ( $k = 2$ , Hedge's  $g = -0.29$ , 95% CI [-0.55; -0.03]), and tDCS compared to sham ( $k = 7$ ,  
377 Hedge's  $g = -0.76$ , 95% CI [-1.31; -0.21]). There was evidence for significant heterogeneity  
378 between trials for several treatment modalities (Table 7; Figure 5).

379  
380 **Acceptability**

381 Sixty-four treatment comparisons were available for all-cause discontinuation rates. There  
382 were no significant differences in drop-out rates for any treatment modalities (Table 8; Figure  
383 6).

384  
385 **Discussion**

386 The present systematic review and meta-analysis examined the efficacy and acceptability of  
387 non-invasive brain stimulation techniques for a current depressive episode in unipolar and

## BRAIN STIMULATION DEPRESSION META-ANALYSIS

388 bipolar depression. We sought to investigate the efficacy of the brain stimulation techniques  
389 without the potential confound of co-initiation of another treatment and in trials which had  
390 included randomised allocation to a sham stimulation treatment arm in order to account for  
391 potential placebo effects.

392  
393 The largest evidence base to date is for high-frequency rTMS over the IDLPFC which is  
394 associated with 3.75 times greater odds of response than sham stimulation as well as odds of  
395 remission that are 2.52 times greater than sham. These findings are consistent with previous  
396 systematic reviews and meta-analyses<sup>41</sup> and have led to the consensus review and treatment  
397 guideline by the *Clinical TMS Society* for daily high-frequency rTMS over the IDLPFC for  
398 the treatment of medication-resistant or medication-intolerant depressive episodes<sup>42</sup>.

399  
400 Additional support for treatment efficacy was revealed for low-frequency rTMS over the  
401 rDLPFC, which was associated with improved rates of response as well as remission.  
402 Bilateral rTMS was associated with higher rates of response but not remission. It is unclear  
403 whether any advantages of bilateral rTMS compared to left-sided high-frequency or right-  
404 sided low-frequency rTMS would be due to the treatment protocol. As bilateral stimulation  
405 delivers a greater number of pulses than unilateral stimulation, unless the number of treatment  
406 sessions or the treatment duration are adjusted for accordingly, it is difficult to reliably assess  
407 whether the difference in stimulation protocol (bilateral vs. unilateral stimulation) or the  
408 difference in the number of stimuli delivered leads to differences in clinical effects<sup>43</sup>.

409  
410 To date, no studies have directly compared dTMS and standard rTMS protocols. In an  
411 exploratory meta-analysis of nine open-label trials, including a total of 150 patients, Kedzior  
412 et al.<sup>44</sup> provided evidence for the antidepressant efficacy of dTMS. The present meta-analysis  
413 found that dTMS was associated with 1.69 times greater odds of response and 2.24 greater

## BRAIN STIMULATION DEPRESSION META-ANALYSIS

414 odds of remission than sham which were statistically significant. While the open-label trials  
415 included in Kedzior et al.'s analysis may have overestimated the true efficacy of dTMS, we  
416 provide initial support for the clinical efficacy of dTMS that was greater than for sham  
417 treatment but less than for high-frequency rTMS over the IDLPFC, low-frequency rTMS over  
418 the rDLPFC or bilateral rTMS.

419

420 The meta-analytic estimates did not indicate significant treatment effects associated with low-  
421 frequency rTMS over the IDLPFC or with sTMS. However, these have been trialled in  
422 only three<sup>45-47</sup> and two studies<sup>21,48</sup>, respectively. Specific treatment effects of TMS that depend  
423 on side and frequency of stimulation have been proposed but it may be possible that low-  
424 frequency rTMS over the IDLPFC has a marginal effect in at least a small number of  
425 patients<sup>47</sup>. Leuchter et al.<sup>48</sup> found sTMS to only be effective when administered at the  
426 individual's alpha frequency and with a minimum of 80% treatment adherence, suggesting a  
427 dose-response relationship.

428

429 With theta burst stimulation, the duration of each treatment session is reduced to a few  
430 minutes. Our meta-analysis did demonstrate almost five times greater odds of response  
431 compared to sham for iTBS over the IDLPFC. However, this estimate is based on two trials  
432 only. One trial had examined remission rates as well<sup>39</sup>, reporting remission rates of 0% for  
433 sham and 9.1% for active stimulation. The meta-analytic estimates for cTBS and the bilateral  
434 modification of TBS did not show any advantage over sham in terms of response rates. The  
435 only trial that reported remission rates for bilateral TBS did not provide evidence for its  
436 antidepressant efficacy either and no data were available to evaluate remission rates following  
437 cTBS.

438

439 Transcranial direct current stimulation is a form of neurostimulation that offers greater

## BRAIN STIMULATION DEPRESSION META-ANALYSIS

440 portability and lower costs relative to TMS. The meta-analysis revealed significant  
441 improvements in response and remission rates following tDCS treatment in comparison to  
442 sham, which was 4.17 times greater for response rates and 2.88 times greater for remission  
443 rates. We have been able to identify the effects of tDCS without potential confounds of co-  
444 initiation of another treatment, revealing significantly greater odds of response as well as  
445 remission<sup>49</sup>. The clinical efficacy of tDCS is evident also in the non-treatment resistant form  
446 of depression, in contrast to most rTMS trials, suggesting that tDCS is a potential initial  
447 therapeutic option for depression.

448  
449 The finding that there were no differences in terms of drop-out rates at study end between the  
450 active treatment and sham conditions for any treatment modality suggests that non-invasive  
451 brain stimulation is generally well tolerated by patients. We chose all-cause discontinuation  
452 rates based on the intention-to-treat sample, representing the most conservative estimate of  
453 treatment acceptability.

454  
455 We chose response and remission rates as our main outcome measures, which are commonly  
456 used in the medical sciences and arguably constitute clinically-useful estimates of the  
457 antidepressant efficacy of treatment. However, the dichotomisation of outcome data has  
458 received criticism because it is known to produce a loss of signal and might inflate Type I  
459 error rates, for example an individual who has a 49% reduction in their depressive severity  
460 scores would not be included in the clinical response rate while a 51% reduction would be  
461 included in the response rate<sup>50</sup>. To address these limitations, we had also analysed continuous  
462 depression severity scores. However, outcome data were not reported for each trial, and some  
463 missing data could not be obtained. Studies have also suggested that the antidepressant  
464 efficacy of active stimulation may separate from sham only after multiple weeks of treatment,  
465 for both rTMS<sup>9</sup> and cTBS<sup>51</sup>. We had examined the acute antidepressant effects at primary

## BRAIN STIMULATION DEPRESSION META-ANALYSIS

466 study endpoint, and we cannot estimate the long-term effects.

467

468 A significant number of TMS studies used active magnetic stimulation with the coil being  
469 angulated at 45 or 90 degrees to the scalp surface as sham condition. Because differences in  
470 coil orientation may produce considerably different sensations on the scalp and coil  
471 angulation might still produce a limited degree of intracortical activity<sup>52</sup>, ensuring a valid  
472 control condition constitutes a methodological challenge. One study placed an inactive coil on  
473 the patient's head while discharging an active coil at least one meter away in order to mimic  
474 the auditory effects of rTMS<sup>53</sup>.

475

476 A more recent approach is to use a specifically designed sham coil that does not generate a  
477 magnetic field but is visually and auditorily indistinguishable from an active coil. A meta-  
478 analysis by Berlim et al.<sup>54</sup> found no significant differences between the number of patients  
479 who correctly guessed their treatment allocation when comparing active high-frequency left-  
480 sided or bilateral rTMS and sham. There were also no significant differences between studies  
481 that utilised angulated coils and sham coils. Blinding integrity is less of a methodological  
482 hurdle for sTMS trials because neither active stimulation nor sham procedure produce any  
483 physical sensation, they look identical, and are comparable in terms of acoustic artefacts.  
484 Only few of the more recent modifications of TMS reported on the adequacy of their blinding  
485 procedure. Given that cross-over designs are particularly prone to unblinding after cross-over,  
486 we included only data corresponding to the initial randomisation in our analyses.

487

488 For tDCS, the sham condition typically involves delivering active stimulation for up to 30  
489 seconds, which mimics the initial somatic sensations without inducing a therapeutic effect.  
490 However, the adequacy of blinding of tDCS sham has also been called into question<sup>55</sup>.

491

## BRAIN STIMULATION DEPRESSION META-ANALYSIS

492 The clinical trials had enrolled patients based on a diagnostic assessment of clinical symptoms  
493 rather than underlying brain pathology. The potential for biological heterogeneity might mask  
494 the clinical efficacy of non-invasive brain stimulation in some trials but could not be assessed  
495 in the present analysis. We implemented reasonably strict inclusion criteria to limit the  
496 influence of a range of potential confounders, for example we excluded RCTs that co-initiated  
497 treatment with medication. However, potential effects of specific medications on the clinical  
498 efficacy of brain stimulation could not be adequately controlled for as patients often had a  
499 large number of heterogeneous treatments prior to enrolling, which might have distorted the  
500 clinical effects of brain stimulation.

501  
502 Finally, compared to the network meta-analysis (NMA) on TMS<sup>29</sup>, we were not able to  
503 compare the active treatments. In the NMA priming rTMS seemed most effective. However,  
504 the two RCTs that used this treatment modality compared it with another active stimulation  
505 and could not be included in the present meta-analysis.

506

### 507 **Conclusion**

508 The present systematic review and meta-analysis supports the efficacy and acceptability of  
509 non-invasive brain stimulation techniques in adult unipolar and bipolar depression. The  
510 strongest evidence was for high-frequency rTMS over the IDLPFC, followed by low-  
511 frequency rTMS over the rDLPFC and bilateral rTMS. Intermittent TBS provides a potential  
512 advance in terms of reduced treatment duration and the meta-analysis did find support for  
513 improved rates of response. tDCS is a potential treatment for non-resistant depression which  
514 has demonstrated efficacy in terms of response as well as remission. All the trials included in  
515 the present meta-analysis had included randomised allocation to a sham treatment arm and we  
516 had excluded trials in which there was co-initiation of another treatment. Some of the more

## BRAIN STIMULATION DEPRESSION META-ANALYSIS

517 recent treatment modalities though require additional trials and more direct comparisons  
518 between different treatment modalities are warranted.

519

### 520 **Authorship contributions**

521 C.H.Y.F. and J.M. conceived the project; J.M. performed the systematic literature search with  
522 supervision by C.H.Y.F; J.M. extracted and analysed the data; D.R.E. reviewed the quality of  
523 the extracted data; J.M. wrote the initial draft; C.H.Y.F. critically revised each draft, including  
524 interpretation of the data; A.R.B. critically revised the paper. All authors read and approved  
525 the final version of this paper. J.M is the guarantor.

526

### 527 **Funding and disclosure**

528 The authors declare no conflict of interest.

529

### 530 **Acknowledgments**

531 We thank Dr Angelo Alonzo & Professor Colleen Loo, Professor Ian Anderson, Dr Lysianne  
532 Beynel, Dr Noomane Bouaziz & Dr Dominique Januel, Dr Poul E Buchholtz, Dr Romain  
533 Duprat & Professor Chris Baeken, Professor Mark S George, Professor Ehud Klein, Professor  
534 Berthold Langguth & Dr Martin Schecklmann, Dr Giuseppe Lanza, Professor Andy Leuchter,  
535 Dr Alessandra Minelli, Professor William M McDonald, Professor Declan McLoughlin, Dr  
536 Marie-Laure Paillère Martinot, Dr Bill Phillips, Professor Robert M Post, Dr Mohammad Ali  
537 Salehinejad, Dr Christos Theleritis, and Professor Abraham Zangen for providing additional  
538 data. We are also grateful to those authors who could not provide additional data but  
539 responded to our inquiry. The views expressed in this article represent those of the authors  
540 and not necessarily those of the individuals who have provided data for the analyses.

541

### 542 **Supplementary material**

## BRAIN STIMULATION DEPRESSION META-ANALYSIS

543 Supplementary information is available online.

544

### 545 **Figure 1**

546 Caption: Preferred Reporting Items for Systematic Reviews and Meta-Analyses (PRISMA)

547 flow diagram of literature search.

548

### 549 **Figure 2**

550 Caption: Contour-enhanced funnel plot of all RCTs included in the meta-analysis of response

551 rates.

552 Legend: rTMS (black); tDCS (navy); TBS (red); dTMS (yellow); sTMS (pink).

553

### 554 **Figure 3**

555 Caption: Forest plot of response rates.

556

### 557 **Figure 4**

558 Caption: Forest plot of remission rates.

559

### 560 **Figure 5**

561 Caption: Forest plot of post-treatment continuous depression scores.

562

### 563 **Figure 6**

564 Caption: Forest plot of all-cause discontinuation rates.



## BRAIN STIMULATION DEPRESSION META-ANALYSIS

### 565 **References**

- 566 1 Kessler, R. C. *et al.* The epidemiology of major depressive disorder: results from the  
567 National Comorbidity Survey Replication (NCS-R). *JAMA***289**, 3095-3105 (2003).
- 568 2 Murray, C. J. *et al.* Global, regional, and national disability-adjusted life years  
569 (DALYs) for 306 diseases and injuries and healthy life expectancy (HALE) for 188  
570 countries, 1990–2013: quantifying the epidemiological transition. *The Lancet***386**,  
571 2145-2191 (2015).
- 572 3 Fekadu, A. *et al.* What happens to patients with treatment-resistant depression? A  
573 systematic review of medium to long term outcome studies. *Journal of Affective*  
574 *Disorders***116**, 4-11 (2009).
- 575 4 Eaton, W. W. *et al.* Population-based study of first onset and chronicity in major  
576 depressive disorder. *Archives of General Psychiatry***65**, 513-520 (2008).
- 577 5 Rush, A. J. *et al.* Acute and longer-term outcomes in depressed outpatients requiring  
578 one or several treatment steps: a STAR\* D report. *American Journal of*  
579 *Psychiatry***163**, 1905-1917 (2006).
- 580 6 Barker, A. T., Jalinous, R. & Freeston, I. L. Non-invasive magnetic stimulation of  
581 human motor cortex. *The Lancet***325**, 1106-1107 (1985).
- 582 7 Rosa, M. A. & Lisanby, S. H. Somatic treatments for mood disorders.  
583 *Neuropsychopharmacology***37**, 102-116 (2012).
- 584 8 Atkinson, L., Sankar, A., Adams, T. M. & Fu, C. H. Recent advances in neuroimaging  
585 of mood disorders: structural and functional neural correlates of depression, changes  
586 with therapy, and potential for clinical biomarkers. *Current Treatment Options in*  
587 *Psychiatry***1**, 278-293 (2014).
- 588 9 O'Reardon, J. P. *et al.* Efficacy and safety of transcranial magnetic stimulation in the  
589 acute treatment of major depression: a multisite randomized controlled trial.  
590 *Biological psychiatry***62**, 1208-1216 (2007).
- 591 10 Janicak, P. G., Sackett, V., Kudrna, K. & Cutler, B. Advances in transcranial magnetic  
592 stimulation for managing major depressive disorders: The utility of TMS for treating  
593 depression continues to widen, as the technology is refined. *Current Psychiatry***15**, 49-  
594 56 (2016).
- 595 11 Rossi, S., Hallett, M., Rossini, P. M., Pascual-Leone, A. & Group, S. o. T. C. Safety,  
596 ethical considerations, and application guidelines for the use of transcranial magnetic  
597 stimulation in clinical practice and research. *Clinical Neurophysiology***120**, 2008-2039  
598 (2009).

## BRAIN STIMULATION DEPRESSION META-ANALYSIS

- 599 12 Conca, A. *et al.* Combining high and low frequencies in rTMS antidepressive  
600 treatment: preliminary results. *Human Psychopharmacology: Clinical and*  
601 *Experimental***17**, 353-356 (2002).
- 602 13 Fitzgerald, P. B. *et al.* A randomized, controlled trial of sequential bilateral repetitive  
603 transcranial magnetic stimulation for treatment-resistant depression. *American Journal*  
604 *of Psychiatry***163**, 88-94 (2006).
- 605 14 Roth, Y., Amir, A., Levkovitz, Y. & Zangen, A. Three-dimensional distribution of the  
606 electric field induced in the brain by transcranial magnetic stimulation using figure-8  
607 and deep H-coils. *Journal of Clinical Neurophysiology***24**, 31-38 (2007).
- 608 15 Greicius, M. D. *et al.* Resting-state functional connectivity in major depression:  
609 abnormally increased contributions from subgenual cingulate cortex and thalamus.  
610 *Biological Psychiatry***62**, 429-437 (2007).
- 611 16 Costafreda, S. G. *et al.* Modulation of amygdala response and connectivity in  
612 depression by serotonin transporter polymorphism and diagnosis. *Journal of Affective*  
613 *Disorders***150**, 96-103 (2013).
- 614 17 Huang, Y.-Z., Edwards, M. J., Rounis, E., Bhatia, K. P. & Rothwell, J. C. Theta burst  
615 stimulation of the human motor cortex. *Neuron***45**, 201-206 (2005).
- 616 18 Chung, S., Hoy, K. & Fitzgerald, P. Theta-burst stimulation: a new form of TMS  
617 treatment for depression? *Depression and Anxiety***32**, 182-192 (2015).
- 618 19 Gamboa, O. L., Antal, A., Moliadze, V. & Paulus, W. Simply longer is not better:  
619 reversal of theta burst after-effect with prolonged stimulation. *Experimental Brain*  
620 *Research***204**, 181-187 (2010).
- 621 20 Nettekoven, C. *et al.* Dose-dependent effects of theta burst rTMS on cortical  
622 excitability and resting-state connectivity of the human motor system. *The Journal of*  
623 *Neuroscience***34**, 6849-6859 (2014).
- 624 21 Jin, Y. & Phillips, B. A pilot study of the use of EEG-based synchronized Transcranial  
625 Magnetic Stimulation (sTMS) for treatment of Major Depression. *BMC Psychiatry***14**,  
626 1 (2014).
- 627 22 Leuchter, A. F., Cook, I. A., Jin, Y. & Phillips, B. The relationship between brain  
628 oscillatory activity and therapeutic effectiveness of transcranial magnetic stimulation  
629 in the treatment of major depressive disorder. *Frontiers in Human Neuroscience***7**  
630 (2013).
- 631 23 Priori, A., Berardelli, A., Rona, S., Accornero, N. & Manfredi, M. Polarization of the  
632 human motor cortex through the scalp. *Neuroreport***9**, 2257-2260 (1998).

## BRAIN STIMULATION DEPRESSION META-ANALYSIS

- 633 24 Nitsche, M. A. & Paulus, W. Excitability changes induced in the human motor cortex  
634 by weak transcranial direct current stimulation. *The Journal of Physiology***527**, 633-  
635 639 (2000).
- 636 25 Nitsche, M. A. *et al.* Transcranial direct current stimulation: state of the art 2008.  
637 *Brain Stimulation***1**, 206-223 (2008).
- 638 26 Nitsche, M. A. & Paulus, W. Sustained excitability elevations induced by transcranial  
639 DC motor cortex stimulation in humans. *Neurology***57**, 1899-1901 (2001).
- 640 27 Merzagora, A. C. *et al.* Prefrontal hemodynamic changes produced by anodal direct  
641 current stimulation. *Neuroimage***49**, 2304-2310 (2010).
- 642 28 Palm, U. *et al.* Home Use, Remotely Supervised, and Remotely Controlled  
643 Transcranial Direct Current Stimulation: A Systematic Review of the Available  
644 Evidence. *Neuromodulation: Technology at the Neural Interface* (2017).
- 645 29 Brunoni, A. R. *et al.* Repetitive transcranial magnetic stimulation for the acute  
646 treatment of major depressive episodes: A systematic review with network meta-  
647 analysis. *JAMA Psychiatry***74**, 143-152 (2017).
- 648 30 Moher, D., Liberati, A., Tetzlaff, J. & Altman, D. G. Preferred reporting items for  
649 systematic reviews and meta-analyses: the PRISMA statement. *Annals of Internal*  
650 *Medicine***151**, 264-269 (2009).
- 651 31 Hamilton, M. A rating scale for depression. *Journal of Neurology, Neurosurgery &*  
652 *Psychiatry***23**, 56-62 (1960).
- 653 32 Montgomery, S. A. & Åsberg, M. A new depression scale designed to be sensitive to  
654 change. *The British Journal of Psychiatry***134**, 382-389 (1979).
- 655 33 Peters, J. L., Sutton, A. J., Jones, D. R., Abrams, K. R. & Rushton, L. Contour-  
656 enhanced meta-analysis funnel plots help distinguish publication bias from other  
657 causes of asymmetry. *Journal of Clinical Epidemiology***61**, 991-996 (2008).
- 658 34 Cochran, W. G. The combination of estimates from different experiments.  
659 *Biometrics***10**, 101-129 (1954).
- 660 35 Higgins, J. P., Thompson, S. G., Deeks, J. J. & Altman, D. G. Measuring  
661 inconsistency in meta-analyses. *British Medical Journal***327**, 557-560 (2003).
- 662 36 Schwarzer, G. Meta: An R package for meta-analysis. *R News***7**, 40-45 (2007).
- 663 37 Higgins, J. P. *et al.* The Cochrane Collaboration's tool for assessing risk of bias in  
664 randomised trials. *BMJ***343**, 889-893 (2011).

## BRAIN STIMULATION DEPRESSION META-ANALYSIS

- 665 38 Nahas, Z., Kozel, F. A., Li, X., Anderson, B. & George, M. S. Left prefrontal  
666 transcranial magnetic stimulation (TMS) treatment of depression in bipolar affective  
667 disorder: a pilot study of acute safety and efficacy. *Bipolar Disorders***5**, 40-47 (2003).
- 668 39 Duprat, R. *et al.* Accelerated intermittent theta burst stimulation treatment in  
669 medication-resistant major depression: A fast road to remission? *Journal of Affective*  
670 *Disorders***200**, 6-14 (2016).
- 671 40 Prasser, J. *et al.* Bilateral prefrontal rTMS and theta burst TMS as an add-on treatment  
672 for depression: a randomized placebo controlled trial. *The World Journal of Biological*  
673 *Psychiatry***16**, 57-65 (2015).
- 674 41 Berlim, M. T., Van den Eynde, F., Tovar-Perdomo, S. & Daskalakis, Z. Response,  
675 remission and drop-out rates following high-frequency repetitive transcranial magnetic  
676 stimulation (rTMS) for treating major depression: a systematic review and meta-  
677 analysis of randomized, double-blind and sham-controlled trials. *Psychological*  
678 *Medicine***44**, 225-239 (2014).
- 679 42 Perera, T. *et al.* The Clinical TMS Society Consensus Review and Treatment  
680 Recommendations for TMS Therapy for Major Depressive Disorder. *Brain*  
681 *Stimulation***9**, 336-346 (2016).
- 682 43 Chen, J.-j. *et al.* Bilateral vs. unilateral repetitive transcranial magnetic stimulation in  
683 treating major depression: a meta-analysis of randomized controlled trials. *Psychiatry*  
684 *Research***219**, 51-57 (2014).
- 685 44 Kedzior, K. K., Gellersen, H. M., Brachetti, A. K. & Berlim, M. T. Deep transcranial  
686 magnetic stimulation (DTMS) in the treatment of major depression: an exploratory  
687 systematic review and meta-analysis. *Journal of Affective Disorders***187**, 73-83 (2015).
- 688 45 Padberg, F. *et al.* Repetitive transcranial magnetic stimulation (rTMS) in  
689 pharmacotherapy-refractory major depression: comparative study of fast, slow and  
690 sham rTMS. *Psychiatry Research***88**, 163-171 (1999).
- 691 46 Kimbrell, T. A. *et al.* Frequency dependence of antidepressant response to left  
692 prefrontal repetitive transcranial magnetic stimulation (rTMS) as a function of  
693 baseline cerebral glucose metabolism. *Biological Psychiatry***46**, 1603-1613 (1999).
- 694 47 Speer, A. M., Wassermann, E. M., Benson, B. E., Herscovitch, P. & Post, R. M.  
695 Antidepressant efficacy of high and low frequency rTMS at 110% of motor threshold  
696 versus sham stimulation over left prefrontal cortex. *Brain Stimulation***7**, 36-41 (2014).

## BRAIN STIMULATION DEPRESSION META-ANALYSIS

- 697 48 Leuchter, A. F. *et al.* Efficacy and safety of low-field synchronized transcranial  
698 magnetic stimulation (sTMS) for treatment of major depression. *Brain Stimulation***8**,  
699 787-794 (2015).
- 700 49 Meron, D., Hedger, N., Garner, M. & Baldwin, D. S. Transcranial direct current  
701 stimulation (tDCS) in the treatment of depression: systematic review and meta-  
702 analysis of efficacy and tolerability. *Neuroscience & Biobehavioral Reviews***57**, 46-62  
703 (2015).
- 704 50. Barnwell-Ménard JL, Li Q, Cohen AA. Effects of categorization method, regression  
705 type, and variable distribution on the inflation of Type-I error rate when categorizing  
706 a confounding variable. *Statistics in medicine* 2015; **34**(6): 936-49.
- 707 51 Chistyakov, A. V. *et al.* Preliminary assessment of the therapeutic efficacy of  
708 continuous theta-burst magnetic stimulation (cTBS) in major depression: a double-  
709 blind sham-controlled study. *Journal of Affective Disorders***170**, 225-229 (2015).
- 710 52 Lisanby, S. H., Gutman, D., Luber, B., Schroeder, C. & Sackeim, H. A. Sham TMS:  
711 intracerebral measurement of the induced electrical field and the induction of motor-  
712 evoked potentials. *Biological Psychiatry***49**, 460-463 (2001).
- 713 53 Loo, C. K., Mitchell, P. B., McFarquhar, T. F., Malhi, G. S. & Sachdev, P. S. A sham-  
714 controlled trial of the efficacy and safety of twice-daily rTMS in major depression.  
715 *Psychological Medicine***37**, 341-349 (2007).
- 716 54 Berlim, M. T., Broadbent, H. J. & Van den Eynde, F. Blinding integrity in randomized  
717 sham-controlled trials of repetitive transcranial magnetic stimulation for major  
718 depression: a systematic review and meta-analysis. *International Journal of*  
719 *Neuropsychopharmacology***16**, 1173-1181 (2013).
- 720 55 Blumberger, D. M., Tran, L. C., Fitzgerald, P. B., Hoy, K. E. & Daskalakis, Z. J. A  
721 randomized double-blind sham-controlled study of transcranial direct current  
722 stimulation for treatment-resistant major depression. *Frontiers in Psychiatry***3**, 119-  
723 126 (2012).

# BRAIN STIMULATION DEPRESSION META-ANALYSIS

Table 1

*Treatment characteristics: TMS studies*

| Authors                         | Location | Frequency (Hz) |       | % rMT            | Total pulses | Sessions | Treatment strategy | Active group    | Sham group |
|---------------------------------|----------|----------------|-------|------------------|--------------|----------|--------------------|-----------------|------------|
|                                 |          | Left           | Right |                  |              |          |                    |                 |            |
| Anderson et al., 2007           | LDLPFC   | 10             | -     | 110 <sup>a</sup> | 12,000       | 12       | Mixed              | Figure-of-eight | Sham-coil  |
| Avery et al., 2006              | LDLPFC   | 10             | -     | 110 <sup>b</sup> | 24,000       | 15       | Mixed              | Figure-of-eight | 90°        |
| Avery et al., 1999              | LDLPFC   | 10             | -     | 80               | NR           | 10       | Mixed              | NR              | 45°        |
| Baeken et al., 2013*            | LDLPFC   | 20             | -     | 110              | 31,200       | 20       | Monotherapy        | Figure-of-eight | 90°        |
| Bakim et al., 2012 <sup>1</sup> | LDLPFC   | 20             | -     | 80; 100          | 24,000       | 30       | Augmentation       | Figure-of-eight | 45°        |
| Berman et al., 2000             | LDLPFC   | 20             | -     | 80               | NR           | 10       | Monotherapy        | Figure-of-eight | 30-45°     |
| Bortolomasi et al., 2007        | LDLPFC   | 20             | -     | 90               | 4,000        | 5        | Mixed              | Circular        | 90°        |
| Boutros et al., 2002            | LDLPFC   | 20             | -     | 80               | 8,000        | 10       | Mixed              | Figure-of-eight | 90°        |
| Chen et al., 2013               | LDLPFC   | 20             | -     | 90               | NR           | 10       | Augmentation       | Figure-of-eight | 90°        |
| Concerto et al., 2015           | LDLPFC   | 10             | -     | 120              | 60,000       | 20       | Augmentation       | Figure-of-eight | 45°        |
| Eschweiler et al., 2000*        | LDLPFC   | 10             | -     | 90               | NR           | 5        | Augmentation       | Figure-of-eight | 90°        |

## BRAIN STIMULATION DEPRESSION META-ANALYSIS

|                                  |        |                    |   |                  |        |    |              |                 |                  |
|----------------------------------|--------|--------------------|---|------------------|--------|----|--------------|-----------------|------------------|
| Fitzgerald et al., 2012 (1)      | LDLPFC | 10                 | - | 120              | NR     | 15 | Mixed        | Figure-of-eight | 45°              |
| Fitzgerald et al., 2003 (1)      | LDLPFC | 10                 | - | 100              | 10,000 | 10 | Augmentation | Figure-of-eight | 45°              |
| Garcia-Toro et al., 2001         | LDLPFC | 20                 | - | 90               | NR     | 10 | Augmentation | Figure-of-eight | 90°              |
| George et al., 2010              | LDLPFC | 10                 | - | 120              | 45,000 | 15 | Monotherapy  | Figure-of-eight | Sham-coil        |
| George et al., 2000 <sup>2</sup> | LDLPFC | 5; 20 <sup>c</sup> | - | 100 <sup>d</sup> | 16,000 | 10 | Monotherapy  | Figure-of-eight | 45°              |
| George et al., 1997*             | LDLPFC | 20                 | - | 80               | 8000   | 10 | Mixed        | Figure-of-eight | 45°              |
| Hansen et al., 2004              | LDLPFC | 10                 | - | 90               | 30,000 | 15 | Augmentation | Figure-of-eight | 90°              |
| Hernández-Ribas et al., 2013     | LDLPFC | 15                 | - | 100              | 22,500 | 15 | Augmentation | Figure-of-eight | 90°              |
| Holtzheimer et al., 2004         | LDLPFC | 10                 | - | 110              | 16,000 | 10 | Monotherapy  | Figure-of-eight | 45° <sup>e</sup> |
| Jakob et al., 2008 (1)           | LDLPFC | 20                 | - | 100              | 20,000 | 10 | Mixed        | Figure-of-eight | Sham-coil        |
| Jakob et al., 2008 (2)           | LDLPFC | 50                 | - | 100              | 20,000 | 10 | Mixed        | Figure-of-eight | Sham-coil        |
| Kimbrell et al., 1999*           | LDLPFC | 20                 | - | 80               | 8,000  | 10 | Monotherapy  | Figure-of-eight | 45°              |
| Kreuzer et al., 2015             | LDLPFC | 10                 | - | 110              | 30,000 | 15 | Augmentation | Figure-of-eight | Sham-coil        |
| Lingeswaran et al., 2011         | LDLPFC | 10                 | - | 100              | NR     | 12 | NR           | Figure-of-eight | 90°              |
| Loo et al., 1999*                | LDLPFC | 10                 | - | 110              | NR     | 10 | Mixed        | Figure-of-eight | 90°              |

## BRAIN STIMULATION DEPRESSION META-ANALYSIS

|                                |        |       |   |                  |        |                 |              |                 |           |
|--------------------------------|--------|-------|---|------------------|--------|-----------------|--------------|-----------------|-----------|
| Nahas et al., 2003             | LDLPFC | 5     | - | 110              | 16,000 | 10              | Monotherapy  | Figure-of-eight | 45°       |
| O'Reardon et al., 2007         | LDLPFC | 10    | - | 120 <sup>g</sup> | 60,000 | 20              | Monotherapy  | Figure-of-eight | Sham-coil |
| Paillère-Martinot et al., 2010 | LDLPFC | 10    | - | 90               | 16,000 | 10              | Augmentation | Figure-of-eight | Sham-coil |
| Speer et al., 2014             | LDLPFC | 20    | - | 110              | 24,000 | 15              | Monotherapy  | Figure-of-eight | 45°       |
| Su et al., 2005 <sup>3</sup>   | LDLPFC | 5; 20 | - | 100              | 16,000 | 10              | Augmentation | Figure-of-eight | 90°       |
| Taylor et al., 2018            | LDLPFC | 10    | - | 120 <sup>g</sup> | 60,000 | 20              | Mixed        | Figure-of-eight | Sham-coil |
| Theleritis et al., 2017 (1)    | LDLPFC | 20    | - | 100              | 24,000 | 15              | Mixed        | Figure-of-eight | 90°       |
| Theleritis et al., 2017 (2)    | LDLPFC | 20    | - | 100              | 48,000 | 30 <sup>f</sup> | Mixed        | Figure-of-eight | 90°       |
| Zheng et al., 2010             | LDLPFC | 15    | - | 110 <sup>g</sup> | 60,000 | 20              | Augmentation | Figure-of-eight | 90°       |

---

### LF-R

|                             |        |   |   |     |       |    |              |                 |           |
|-----------------------------|--------|---|---|-----|-------|----|--------------|-----------------|-----------|
| Fitzgerald et al., 2003 (2) | RDLPFC | - | 1 | 100 | 3,000 | 10 | Augmentation | Figure-of-eight | 45°       |
| Januel et al., 2006         | RDLPFC | - | 1 | 90  | 1,920 | 16 | Monotherapy  | Figure-of-eight | Sham-coil |
| Pallanti et al., 2010 (1)   | RDLPFC | - | 1 | 110 | 6,300 | 15 | Augmentation | Figure-of-eight | Sham-coil |

---

### LF-L

|                        |        |   |   |    |       |    |             |                 |     |
|------------------------|--------|---|---|----|-------|----|-------------|-----------------|-----|
| Kimbrell et al., 1999* | LDLPFC | 1 | - | 80 | 8,000 | 10 | Monotherapy | Figure-of-eight | 45° |
|------------------------|--------|---|---|----|-------|----|-------------|-----------------|-----|



## BRAIN STIMULATION DEPRESSION META-ANALYSIS

|                                    |        |     |   |                 |        |                 |              |                 |           |
|------------------------------------|--------|-----|---|-----------------|--------|-----------------|--------------|-----------------|-----------|
| Padberg et al., 1999               | LDLPFC | 0.3 | - | 90              | 1,250  | 5               | Mixed        | Figure-of-eight | 90°       |
| Speer et al., 2014                 | LDLPFC | 1   | - | 110             | 24,000 | 15              | Monotherapy  | Figure-of-eight | 45°       |
| BL                                 |        |     |   |                 |        |                 |              |                 |           |
| Fitzgerald et al., 2006            | DLPFC  | 10  | 1 | 110(R); 100(L)  | 7,200  | 10              | Mixed        | Figure-of-eight | 45°       |
| Fitzgerald et al., 2016            | DLPFC  | 10  | 1 | 110             | 40,000 | 20              | Mixed        | Figure-of-eight | 45°       |
| Fitzgerald et al., 2012 (2)        | DLPFC  | 10  | 1 | 120             | NR     | 15              | Mixed        | Figure-of-eight | 45°       |
| McDonald et al., 2006 <sup>4</sup> | DLPFC  | 10  | 1 | 110             | 16,000 | 10              | Monotherapy  | Figure-of-eight | 90°       |
| Pallanti et al., 2010 (2)          | DLPFC  | 10  | 1 | 110(R); 100(L)  | 21,300 | 15              | Augmentation | Figure-of-eight | Sham-coil |
| Prasser et al., 2015 (1)           | DLPFC  | 10  | 1 | 110             | 30,000 | 15              | Augmentation | Figure-of-eight | Sham-coil |
| iTBS                               |        |     |   |                 |        |                 |              |                 |           |
| Duprat et al., 2016*               | LDLPFC | 50  | - | 110             | 32,400 | 20 <sup>i</sup> | Monotherapy  | Figure-of-eight | Sham-coil |
| Li et al., 2014 (1)                | LDLPFC | 50  | - | 80 <sup>j</sup> | 18,000 | 10              | Mixed        | Figure-of-eight | 90°       |
| cTBS                               |        |     |   |                 |        |                 |              |                 |           |
| Li et al., 2014 (2)                | RDLPFC | 50  | - | 80 <sup>j</sup> | 18,000 | 10              | Mixed        | Figure-of-eight | 90°       |
| BLTBS                              |        |     |   |                 |        |                 |              |                 |           |

## BRAIN STIMULATION DEPRESSION META-ANALYSIS

|                               |         |           |    |                  |        |    |              |                 |           |
|-------------------------------|---------|-----------|----|------------------|--------|----|--------------|-----------------|-----------|
| Li et al., 2014 (3)           | DLPFC   | 50        | 50 | 80 <sup>i</sup>  | 36,000 | 10 | Mixed        | Figure-of-eight | 90°       |
| Prasser et al., 2015 (2)      | DLPFC   | 50        | 50 | 80               | 36,000 | 15 | Augmentation | Figure-of-eight | Sham-coil |
| dTMS                          |         |           |    |                  |        |    |              |                 |           |
| Levkovitz et al., 2015        | LDLPFC  | 18        | -  | 120 <sup>h</sup> | 39,600 | 20 | Monotherapy  | H1              | Sham-coil |
| Tavares et al., 2017          | LDLPFC  | 18        | -  | 120              | 39,600 | 20 | Augmentation | H1              | Sham-coil |
| sTMS                          |         |           |    |                  |        |    |              |                 |           |
| Jin et al., 2014 <sup>5</sup> | Midline | IAF; 8-13 |    | -                | -      | 20 | Augmentation | sTMS            | NMRS      |
| Leuchter et al., 2015         | Midline | IAF       |    | -                | -      | 30 | Monotherapy  | sTMS            | NMRS      |

*Note.* Numbers in parentheses behind authors indicate that multiple active treatment arms of the same study are reported. Hz = hertz; rMT = resting motor threshold; LDLPFC = left dorsolateral prefrontal cortex; RDLPFC = right dorsolateral prefrontal cortex; TMS = transcranial magnetic stimulation; HF-L = high-frequency, left-sided repetitive transcranial magnetic stimulation; LF-R = low-frequency, right-sided repetitive transcranial magnetic stimulation; BL = bilateral repetitive transcranial magnetic stimulation; iTBS = intermittent theta burst stimulation; cTBS = continuous theta burst stimulation; BLTBS = bilateral theta burst stimulation; dTMS = deep transcranial magnetic stimulation; sTMS = synchronised transcranial magnetic stimulation; IAF = individual alpha frequency; NMRS = non-magnetic rotating shaft; NR = not reported. \*Cross-over design. <sup>1-5</sup>Two active treatment groups were combined. <sup>a</sup>Two patients received active stimulation at 100% rMT. <sup>b</sup>Stimulation delivered at estimated prefrontal threshold. <sup>c</sup>During the 5th session, stimulation was delivered for 2min at 10Hz. <sup>d</sup>During the 5th session, stimulation was delivered for 2min at 60% rMT. <sup>e</sup>Two patients received sham treatment with the coil angulated at 90°. <sup>f</sup>Received treatment twice daily. <sup>g</sup>During the first week, 110% rMT could be used for tolerability. <sup>h</sup>During the first three treatment session, rMT could be titrated from 100% to 120%. <sup>i</sup>Received treatment five times daily. <sup>j</sup>Stimulation delivered at active motor threshold.

## BRAIN STIMULATION DEPRESSION META-ANALYSIS

Table 2

*Sample characteristics: TMS studies*

| Authors                            | Number of participants (female) |         | Age         |             | Diagnosis | HDRS / MADRS              |                           | Excluded psychosis | Status     | Treatment resistance |
|------------------------------------|---------------------------------|---------|-------------|-------------|-----------|---------------------------|---------------------------|--------------------|------------|----------------------|
|                                    | Active                          | Sham    | Active      | Sham        |           | Active                    | Sham                      |                    |            |                      |
| HF-L                               |                                 |         |             |             |           |                           |                           |                    |            |                      |
| Anderson et al., 2007 <sup>1</sup> | 13 (7)                          | 16 (9)  | 48.0 (8.0)  | 46.0 (12.0) | MDD       | 26.7 (3.6) <sup>M</sup>   | 27.7 (7.1) <sup>M</sup>   | No                 | Outpatient | Mixed                |
| Avery et al., 2006 <sup>2</sup>    | 35 (21)                         | 33 (16) | 44.3 (10.3) | 44.2 (9.7)  | MDD       | 23.5 (3.9) <sup>a</sup>   | 23.5 (2.9) <sup>a</sup>   | Yes                | NR         | TRD                  |
| Avery et al., 1999                 | 4 (4)                           | 2 (1)   | 44.3 (10.1) | 45.0 (7.1)  | Mixed     | 21.3 (6.7) <sup>b</sup>   | 19.5 (8.1) <sup>b</sup>   | Yes                | Outpatient | TRD                  |
| Baeken et al., 2013                | 9 (7)                           | 11 (5)  | 51.8 (12.1) | 47.3 (13.7) | MDD       | 24.8 (7.1) <sup>a</sup>   | 26.5 (8.7) <sup>a</sup>   | Yes                | Mixed      | TRD                  |
| Bakim et al., 2012 <sup>3</sup>    | 23 (20)                         | 12 (11) | 40.8 (10.0) | 44.4 (10.2) | MDD       | 23.6 (3.6) <sup>a</sup>   | 25.6 (3.8) <sup>a</sup>   | Yes                | Outpatient | TRD                  |
| Berman et al., 2000 <sup>2</sup>   | 10 (2)                          | 10 (4)  | 45.2 (9.5)  | 39.4 (10.8) | Mixed     | 37.1 (9.7) <sup>c</sup>   | 37.3 (8.5) <sup>c</sup>   | No                 | Mixed      | TRD                  |
| Bortolomasi et al., 2007           | 12 (7)                          | 7 (4)   | NR          | NR          | Mixed     | 25.17 (7.84) <sup>d</sup> | 21.57 (2.15) <sup>d</sup> | No                 | Inpatient  | TRD                  |
| Boutros et al., 2002 <sup>6</sup>  | 12 (4)                          | 9 (1)   | 49.5 (8.0)  | 52.0 (7.0)  | MDD       | 34.4 (10.1) <sup>c</sup>  | 31.7 (4.9) <sup>c</sup>   | No                 | Outpatient | TRD                  |

## BRAIN STIMULATION DEPRESSION META-ANALYSIS

|                                          |         |         |                             |                           |       |                                |                                |     |            |         |
|------------------------------------------|---------|---------|-----------------------------|---------------------------|-------|--------------------------------|--------------------------------|-----|------------|---------|
| Chen et al., 2013                        | 10 (7)  | 10 (4)  | 44.1 (4.4)                  | 47.3 (3.5)                | MDD   | 23.5 (1.9) <sup>a</sup>        | 24.9 (1.9) <sup>a</sup>        | No  | Inpatient  | TRD     |
| Concerto et al., 2015                    | 15 (6)  | 15 (7)  | 51.0 (6.5)                  | 53.0 (6.7)                | MDD   | 22.0 (21.0; 24.0) <sup>b</sup> | 21.0 (20.0; 22.0) <sup>b</sup> | Yes | Outpatient | TRD     |
| Eschweiler et al., 2000                  | 5 (NR)  | 5 (NR)  | NR                          | NR                        | MDD   | 27.4 (4.6) <sup>b</sup>        | 20.2 (3.8) <sup>b</sup>        | No  | NR         | non-TRD |
| Fitzgerald et al., 2012 (1) <sup>2</sup> | 24 (15) | 20 (8)  | 43.4 (12.7)                 | 44.9 (15.7)               | MDD   | 23.7 (3.8) <sup>a</sup>        | 22.8 (2.1) <sup>a</sup>        | No  | NR         | TRD     |
| Fitzgerald et al., 2003 (1)              | 20 (8)  | 20 (11) | 42.2 (9.8)                  | 49.2 (14.2)               | Mixed | 36.1 (7.5) <sup>M</sup>        | 35.7 (8.1) <sup>M</sup>        | No  | Outpatient | TRD     |
| Garcia-Toro et al., 2001                 | 17 (7)  | 18 (8)  | 51.5 (15.9)                 | 50.0 (11.0)               | MDD   | 27.1 (6.7) <sup>b</sup>        | 25.6 (4.9) <sup>b</sup>        | No  | NR         | TRD     |
| George et al., 2010 <sup>2</sup>         | 92 (58) | 98 (50) | 47.7 (10.6)                 | 46.5 (12.3)               | MDD   | 26.3 (5.0) <sup>d</sup>        | 26.5 (4.8) <sup>d</sup>        | Yes | Outpatient | TRD     |
| George et al., 2000 <sup>4</sup>         | 20 (13) | 10 (6)  | 42.4 (10.5)                 | 48.5 (8.0)                | Mixed | 28.2 (5.9) <sup>b</sup>        | 23.8 (4.1) <sup>b</sup>        | Yes | Outpatient | Mixed   |
| George et al., 1997                      | 7 (6)   | 5 (5)   | 42.4 (15.5)                 | 41.0 (8.3)                | Mixed | 30.0 (4.0) <sup>b</sup>        | 26.0 (3.0) <sup>b</sup>        | Yes | Outpatient | non-TRD |
| Hansen et al., 2004 <sup>6</sup>         | 6 (2)   | 7 (2)   | 42.5 (38; 58) <sup>13</sup> | 46 (44; 62) <sup>13</sup> | Mixed | 26.5 (21.5; 27.6) <sup>a</sup> | 23.8 (19.4; 28.0) <sup>a</sup> | No  | Inpatient  | NR      |
| Hernández-Ribas et al., 2013             | 10 (8)  | 11 (8)  | 42.6 (5.6)                  | 50.1 (8.1)                | Mixed | 19.7 (3.8) <sup>b</sup>        | 16.6 (2.4) <sup>b</sup>        | Yes | Outpatient | TRD     |
| Holtzheimer et al., 2004                 | 7 (4)   | 8 (3)   | 40.4 (8.5)                  | 45.4 (4.9)                | MDD   | 22.7 (5.3) <sup>a</sup>        | 20.8 (6.3) <sup>a</sup>        | Yes | Outpatient | TRD     |
| Jakob 2008 (1)                           | 12 (6)  | 12 (5)  | NR                          | NR                        | MDD   | 27.2 (NR) <sup>a</sup>         | 23.9 (NR) <sup>a</sup>         | NR  | NR         | NR      |

## BRAIN STIMULATION DEPRESSION META-ANALYSIS

|                                          |          |          |             |                          |                  |                          |                         |     |            |     |
|------------------------------------------|----------|----------|-------------|--------------------------|------------------|--------------------------|-------------------------|-----|------------|-----|
| Jakob 2008 (2)                           | 12 (7)   | 12 (5)   | NR          | NR                       | MDD              | 24.1 (NR) <sup>a</sup>   | 23.9 (NR) <sup>a</sup>  | NR  | NR         | NR  |
| Kimbrell et al., 1999                    | 5 (2)    | 3 (1)    | 40.2 (15.1) | 43.7 (19.1)              | Mixed            | 25.0 (6.6) <sup>b</sup>  | 24.3 (6.8) <sup>b</sup> | No  | Mixed      | TRD |
| Kreuzer et al., 2015                     | 15 (8)   | 12 (8)   | 46.1 (9.5)  | 43.8 (10.5)              | Mixed            | 22.3 (4.7) <sup>b</sup>  | 22.3 (4.7) <sup>b</sup> | No  | Inpatient  | NR  |
| Lingeswaran et al., 2011                 | 9 (6)    | 14 (8)   | 34 (10.5)   | 37.2 (11.8)              | MDD              | 22.8 (3.7) <sup>a</sup>  | 22.0 (3.1) <sup>a</sup> | Yes | Mixed      | NR  |
| Loo et al., 1999                         | 9 (NR)   | 9 (NR)   | 45.7 (14.7) | 50.9 (14.7)              | Mixed            | 21.5 (NR) <sup>a</sup>   | 25.1 (NR) <sup>a</sup>  | No  | Mixed      | TRD |
| Nahas et al., 2003                       | 11 (7)   | 12 (7)   | 42.4 (7.3)  | 43.4 (9.3) <sup>11</sup> | BD <sup>12</sup> | 32.5 (4.3) <sup>c</sup>  | 32.8 (7.6) <sup>c</sup> | NA  | Outpatient | NR  |
| O'Reardon et al., 2007 <sup>6</sup>      | 155 (86) | 146 (74) | 47.9 (11.0) | 48.7 (10.6)              | MDD              | 22.6 (3.3) <sup>a</sup>  | 22.9 (3.5) <sup>a</sup> | Yes | Outpatient | TRD |
| Paillère-Martinot et al., 2010           | 18 (11)  | 14 (10)  | 48.2 (7.8)  | 46.6 (10.3)              | Mixed            | 26.0 (6.4) <sup>b</sup>  | 25.9 (6.7) <sup>b</sup> | Yes | Inpatient  | TRD |
| Speer et al., 2014 <sup>2</sup>          | 8 (5)    | 8 (11)   | 41.3 (14.5) | 44.9 (9.1)               | Mixed            | 35.8 (10.6) <sup>c</sup> | 24.0 (4.6) <sup>c</sup> | No  | Mixed      | TRD |
| Su et al., 2005 <sup>5</sup>             | 20 (15)  | 10 (7)   | 43.4 (11.3) | 42.6 (11.0)              | Mixed            | 24.9 (6.4) <sup>b</sup>  | 22.7 (4.7) <sup>b</sup> | Yes | NR         | TRD |
| Taylor et al., 2018                      | 16 (11)  | 16 (10)  | 46.9 (10.7) | 44.13 (11.1)             | MDD              | 16 (3.9) <sup>a</sup>    | 13.1 (2.3) <sup>a</sup> | Yes | Outpatient | TRD |
| Theleritis et al., 2017 (1) <sup>6</sup> | 26 (15)  | 20 (10)  | 39.1 (10.1) | 38.0 (9.9)               | MDD              | 30.6 (3.2) <sup>a</sup>  | 29.4 (3.2) <sup>a</sup> | Yes | Outpatient | TRD |
| Theleritis et al., 2017 (2) <sup>6</sup> | 26 (11)  | 24 (10)  | 38.9 (13.9) | 39.4 (8.9)               | MDD              | 29.7 (4.6) <sup>a</sup>  | 30.3 (3.6) <sup>a</sup> | Yes | Outpatient | TRD |

## BRAIN STIMULATION DEPRESSION META-ANALYSIS

|                                          |         |         |             |               |       |                          |                           |     |            |         |
|------------------------------------------|---------|---------|-------------|---------------|-------|--------------------------|---------------------------|-----|------------|---------|
| Zheng et al., 2010                       | 19 (7)  | 15 (5)  | 26.9 (6.2)  | 26.7 (4.3)    | MDD   | 24.6 (3.0) <sup>a</sup>  | 24.6 (2.8) <sup>a</sup>   | Yes | NR         | TRD     |
| LF-R                                     |         |         |             |               |       |                          |                           |     |            |         |
| Fitzgerald et al., 2003 (2)              | 20 (7)  | 20 (11) | 45.6 (11.5) | 49.2 (14.2)   | Mixed | 37.7 (8.4) <sup>M</sup>  | 35.7 (8.1) <sup>M</sup>   | No  | Outpatient | TRD     |
| Januel et al., 2006 <sup>2</sup>         | 11 (9)  | 16 (12) | 38.6 (11.2) | 37.2 (11.7)   | MDD   | 21.7 (3.5) <sup>a</sup>  | 22.5 (2.7) <sup>a</sup>   | Yes | Inpatient  | non-TRD |
| Pallanti et al., 2010 (1)                | 20 (12) | 20 (12) | 51.2 (12.5) | 47.9 (9.1)    | MDD   | 28.0 (5.9) <sup>a</sup>  | 29.1 (3.5) <sup>a</sup>   | Yes | Outpatient | TRD     |
| LF-L                                     |         |         |             |               |       |                          |                           |     |            |         |
| Kimbrell et al., 1999 (2) <sup>2</sup>   | 5 (4)   | 3 (1)   | 44 (15.92)  | 43.67 (19.14) | Mixed | 34.4 (7.99) <sup>b</sup> | 24.33 (6.81) <sup>b</sup> | No  | Mixed      | TRD     |
| Padberg et al., 1999                     | 6 (5)   | 6 (4)   | 46.7 (14.7) | 43.3 (11.6)   | MDD   | 26.7 (9.4) <sup>b</sup>  | 22.2 (8.8) <sup>b</sup>   | NR  | NR         | TRD     |
| Speer et al., 2014                       | 8 (5)   | 8 (3)   | 39.6 (9)    | 44.9 (9.1)    | Mixed | 28.6 (7.6) <sup>c</sup>  | 24 (4.6) <sup>c</sup>     | No  | Mixed      | TRD     |
| BL                                       |         |         |             |               |       |                          |                           |     |            |         |
| Fitzgerald et al., 2006 <sup>2</sup>     | 25 (15) | 25 (16) | 46.8 (10.7) | 43.7 (10.2)   | Mixed | 22.5 (7.4) <sup>a</sup>  | 19.8 (4.4) <sup>a</sup>   | No  | Outpatient | TRD     |
| Fitzgerald et al., 2016 <sup>7</sup>     | 23 (13) | 23 (13) | 46.3 (12.6) | 49.7 (11.0)   | BD    | 23.2 (4.0) <sup>a</sup>  | 23.0 (5.1) <sup>a</sup>   | NA  | Outpatient | TRD     |
| Fitzgerald et al., 2012 (2) <sup>2</sup> | 22 (14) | 20 (8)  | 40.5 (15.5) | 44.9 (15.7)   | MDD   | 24.3 (3.6) <sup>a</sup>  | 22.8 (2.1) <sup>a</sup>   | No  | NR         | TRD     |

## BRAIN STIMULATION DEPRESSION META-ANALYSIS

|                                     |          |          |               |               |       |                           |                           |     |            |       |
|-------------------------------------|----------|----------|---------------|---------------|-------|---------------------------|---------------------------|-----|------------|-------|
| McDonald et al., 2006 <sup>8</sup>  | 50 (27)  | 12 (5)   | NR            | NR            | Mixed | 26.4 (1.38) <sup>b</sup>  | 27.33 (2.86) <sup>b</sup> | Yes | Outpatient | TRD   |
| Pallanti et al., 2010 (2)           | 20 (11)  | 20 (12)  | 47.6 (12.3)   | 47.9 (9.1)    | MDD   | 28.8 (6.0) <sup>a</sup>   | 29.1 (3.5) <sup>a</sup>   | Yes | Outpatient | TRD   |
| Prasser et al., 2015 (1)            | 17 (8)   | 17 (9)   | 50.4 (9.9)    | 42.6 (12.4)   | Mixed | 25.0 (4.4) <sup>b</sup>   | 25.3 (5.4) <sup>b</sup>   | No  | Mixed      | Mixed |
| iTBS                                |          |          |               |               |       |                           |                           |     |            |       |
| Duprat et al., 2016                 | 22 (16)  | 25 (17)  | 40.09 (11.45) | 43.16 (12.15) | MDD   | 21.14 (4.99) <sup>a</sup> | 21.52 (6.21) <sup>a</sup> | Yes | Mixed      | TRD   |
| Li et al., 2014 (1)                 | 15 (8)   | 15 (11)  | 42.4 (NR)     | 46.9 (NR)     | MDD   | 23.1 (3.9) <sup>a</sup>   | 23.8 (3.2) <sup>a</sup>   | Yes | NR         | TRD   |
| cTBS                                |          |          |               |               |       |                           |                           |     |            |       |
| Li et al., 2014 (2)                 | 15 (10)  | 15 (11)  | 49.2 (NR)     | 46.9 (NR)     | MDD   | 24.3 (5.5) <sup>a</sup>   | 23.8 (3.2) <sup>a</sup>   | Yes | NR         | TRD   |
| BLTBS                               |          |          |               |               |       |                           |                           |     |            |       |
| Li et al., 2014 (3)                 | 15 (11)  | 15 (11)  | 42.5 (NR)     | 46.9 (NR)     | MDD   | 25.4 (5.1) <sup>a</sup>   | 23.8 (3.2) <sup>a</sup>   | Yes | NR         | TRD   |
| Prasser et al., 2015 (2)            | 20 (10)  | 17 (9)   | 48.2 (10.9)   | 42.6 (12.4)   | Mixed | 27.4 (6.5) <sup>b</sup>   | 25.3 (5.4) <sup>b</sup>   | No  | Mixed      | Mixed |
| dTMS                                |          |          |               |               |       |                           |                           |     |            |       |
| Levkovitz et al., 2015 <sup>6</sup> | 101 (48) | 111 (53) | 45.1 (11.7)   | 47.6 (11.6)   | MDD   | 23.5 (4.3) <sup>b</sup>   | 23.4 (3.7) <sup>b</sup>   | Yes | Outpatient | TRD   |

## BRAIN STIMULATION DEPRESSION META-ANALYSIS

|                                    |         |         |             |             |     |                           |                          |     |            |         |
|------------------------------------|---------|---------|-------------|-------------|-----|---------------------------|--------------------------|-----|------------|---------|
| Tavares et al., 2017 <sup>6</sup>  | 25 (17) | 25 (18) | 43.5 (12)   | 41.2 (8.9)  | BD  | 25.32 (3.76) <sup>a</sup> | 25.8 (5.25) <sup>a</sup> | NA  | Outpatient | TRD     |
| sTMS                               |         |         |             |             |     |                           |                          |     |            |         |
| Jin et al., 2014 <sup>6,9,10</sup> | 29 (16) | 16 (9)  | 42.5 (15.0) | 46.3 (12.7) | MDD | 21.3 (4.0) <sup>a</sup>   | 19.4 (4.1) <sup>a</sup>  | No  | Outpatient | non-TRD |
| Leuchter et al., 2015              | 59 (NR) | 61 (NR) | 46.7 (11.2) | 45.7 (12.6) | MDD | 21.8 (3.8) <sup>a</sup>   | 21.2 (2.9) <sup>a</sup>  | Yes | Mixed      | Mixed   |

*Note.* Mean ages are reported in years with standard deviation in parentheses for each of the active and sham treatment arms. The mean Hamilton Depression Rating Scale (HDRS) score at baseline is reported for each study with standard deviation in parentheses (except for Concerto et al., 2015 and Hansen et al., 2004 for which median, first quartile, and third quartile are reported). The Montgomery-Åsberg Depression Rating Scale (MADRS) score, denoted with superscript <sup>M</sup>, is reported when the HDRS was not recorded. Means and standard deviations are rounded to the first figure after the decimal. Status refers to whether patients were outpatients, inpatients in a hospital admission, or whether there were both outpatients and inpatients (mixed). TMS = transcranial magnetic stimulation; HF-L = high-frequency left-sided repetitive transcranial magnetic stimulation; LF-R = low-frequency right-sided repetitive transcranial magnetic stimulation; BL = bilateral repetitive transcranial magnetic stimulation; iTBS = intermittent theta burst stimulation; cTBS = continuous theta burst stimulation; BLTBS = bilateral theta burst stimulation; dTMS = deep transcranial magnetic stimulation; sTMS = synchronised transcranial magnetic stimulation; NR = not reported; NA = not applicable; MDD = major depressive disorder; BD = bipolar depression; TRD = treatment resistant depression. <sup>1</sup>MADRS based on the intention-to-treat sample who received  $\geq 1$  session of active stimulation. <sup>2</sup>Numbers are based on the intention-to-treat sample. <sup>3,4,5,8,9</sup>Two active treatment groups were combined. <sup>6</sup>Numbers based on the intention-to-treat sample who received  $\geq 1$  session of active stimulation. <sup>7</sup>HDRS based on the intention-to-treat sample. <sup>10</sup>Age based on the intention-to-treat sample who received  $\geq 1$  session of active stimulation. <sup>11</sup>Age based on 11 patients. <sup>12</sup>Two patients had mixed features. <sup>13</sup>Indicates Median and IQR. <sup>a</sup>HDRS-17. <sup>b</sup>HDRS-21. <sup>c</sup>HDRS-25. <sup>d</sup>HDRS-24. <sup>e</sup>HDRS-28.



## BRAIN STIMULATION DEPRESSION META-ANALYSIS

Table 3

*Treatment characteristics: tDCS studies*

| Authors                           | Location        |                   | Electrode size    | Current strength | Current density | Session duration | Number of sessions | Treatment strategy | Sham stimulation |
|-----------------------------------|-----------------|-------------------|-------------------|------------------|-----------------|------------------|--------------------|--------------------|------------------|
|                                   | Anode           | Cathode/Reference |                   |                  |                 |                  |                    |                    |                  |
| Fregni et al., 2006a              | F3              | FP2               | 35cm <sup>2</sup> | 1mA              | 0.028           | 20min            | 5                  | Monotherapy        | 05sec            |
| Fregni et al., 2006b              | F3              | FP2               | 35cm <sup>2</sup> | 1mA              | 0.028           | 20min            | 5                  | Monotherapy        | 05sec            |
| Boggio et al., 2008 <sup>1</sup>  | F3              | FP2; Midline      | 35cm <sup>2</sup> | 2mA              | 0.057           | 20min            | 10                 | Monotherapy        | 30sec            |
| Loo et al., 2010                  | pF3             | F8                | 35cm <sup>2</sup> | 1mA              | 0.028           | 20min            | 5                  | Mixed              | 30sec            |
| Blumberger et al., 2012           | F3              | F4                | 35cm <sup>2</sup> | 2mA              | 0.057           | 20min            | 15                 | Mixed              | 30sec            |
| Brunoni et al., 2013 <sup>2</sup> | F3              | F4                | 25cm <sup>2</sup> | 2mA              | 0.080           | 30min            | 12                 | Monotherapy        | 60sec            |
| Salehinejad et al., 2015          | F3              | F4                | 35cm <sup>2</sup> | 2mA              | 0.057           | 20min            | 22                 | Monotherapy        | 30sec            |
| Salehinejad et al., 2017          | F3              | F4                | 35cm <sup>2</sup> | 2mA              | 0.057           | 30min            | 10                 | Monotherapy        | 30sec            |
| Brunoni et al., 2017 <sup>2</sup> | F3              | F4                | 25cm <sup>2</sup> | 2mA              | 0.080           | 30min            | 10                 | Monotherapy        | 30sec            |
| Sampaio-Junior et al., 2017       | F3 <sup>3</sup> | F4 <sup>3</sup>   | 25cm <sup>2</sup> | 2mA              | 0.080           | 30min            | 12                 | Augmentation       | 30sec            |

*Note.* Electrode locations are reported according to the EEG 10/20 system. Current densities are reported in mA/cm<sup>2</sup>. Sham stimulation indicates the duration of time that current was applied for giving an initial sensation of tDCS on the scalp. tDCS = transcranial direct current stimulation. <sup>1</sup>Two sham treatment groups were combined. <sup>2</sup>Patients in sham group also

## BRAIN STIMULATION DEPRESSION META-ANALYSIS

---

received an oral placebo tablet.<sup>3</sup>Omnilateral electrode system.

## BRAIN STIMULATION DEPRESSION META-ANALYSIS

Table 4

*Sample characteristics: tDCS studies*

| Authors                                | Number of participants |         | Age         |               | Diagnosis | HDRS                      |                          | Excluded psychosis | Status     | Treatment resistance |
|----------------------------------------|------------------------|---------|-------------|---------------|-----------|---------------------------|--------------------------|--------------------|------------|----------------------|
|                                        | (female)               |         |             |               |           |                           |                          |                    |            |                      |
|                                        | Active                 | Sham    | Active      | Sham          |           | Active                    | Sham                     |                    |            |                      |
| Fregni et al., 2006a                   | 5 (NR)                 | 5 (NR)  | NR          | NR            | MDD       | NR                        | NR                       | NR                 | NR         | NR                   |
| Fregni et al., 2006b                   | 9 (5)                  | 9 (6)   | 47.6 (10.4) | 45.3 (9.3)    | MDD       | 23,6 (5,0)                | 25,9 (4,3)               | Yes <sup>a</sup>   | Outpatient | NR                   |
| Boggio et al., 2008 <sup>1</sup>       | 21 (14)                | 19 (13) | 51.6 (7.7)  | 46.4 (7.1)    | MDD       | 21,1 (4,4) <sup>b</sup>   | 21,8 (4,8) <sup>b</sup>  | Yes                | NR         | Mixed                |
| Loo et al., 2010 <sup>2</sup>          | 20 (11)                | 20 (11) | 49.0 (10.0) | 45.6 (12.5)   | MDD       | 18,3 (5,8) <sup>c</sup>   | 17,3 (4,7) <sup>c</sup>  | Yes <sup>a</sup>   | Outpatient | Mixed                |
| Blumberger et al., 2012 <sup>3,6</sup> | 13 (10)                | 11 (10) | 45.3 (11.6) | 49.7 (9.4)    | MDD       | 24,9 (3,1) <sup>c</sup>   | 24,1 (2,9) <sup>c</sup>  | Yes                | Outpatient | TRD                  |
| Brunoni et al., 2013 <sup>4</sup>      | 30 (21)                | 30 (20) | 41.0 (12.0) | 46.4 (14.0)   | MDD       | 21,0 (3,8) <sup>c</sup>   | 22,0 (4,2) <sup>c</sup>  | Yes                | Outpatient | Mixed                |
| Salehinejad et al., 2015               | 15 (8)                 | 15 (9)  | 28.7 (5.87) | 27.9 (5.84)   | MDD       | 24.7 (3.05) <sup>d</sup>  | 22.8 (2.06) <sup>d</sup> | Yes                | Outpatient | TRD                  |
| Salehinejad et al., 2017               | 12 (7)                 | 12 (8)  | 26.8 (7.1)  | 25.5 (4.6)    | MDD       | 24,6 (2,6) <sup>d</sup>   | 22,6 (1,9) <sup>d</sup>  | Yes                | Outpatient | non-TRD              |
| Brunoni et al., 2017 <sup>5,6,7</sup>  | 91 (64)                | 60 (41) | 44 (11.19)  | 40.88 (12.87) | MDD       | 21.93 (3.89) <sup>c</sup> | 22.7 (4.27) <sup>c</sup> | Yes                | Outpatient | Mixed                |

## BRAIN STIMULATION DEPRESSION META-ANALYSIS

|                                          |         |         |             |             |    |            |            |    |            |       |
|------------------------------------------|---------|---------|-------------|-------------|----|------------|------------|----|------------|-------|
| Sampaio-Junior et al., 2017 <sup>8</sup> | 30 (16) | 29 (24) | 46.2 (11.8) | 45.7 (10.3) | BD | 23.1 (3.9) | 23.5 (4.7) | NA | Outpatient | Mixed |
|------------------------------------------|---------|---------|-------------|-------------|----|------------|------------|----|------------|-------|

---

*Note.* Mean ages are reported in years with standard deviation in parentheses for each of the active and sham treatment arms. The mean Hamilton Depression Rating Scale (HDRS) score at baseline is reported for each study with standard deviation in parentheses. Means and standard deviations are rounded to the first figure after the decimal. Status refers to whether patients were outpatients, inpatients in a hospital admission, or whether there were both outpatients and inpatients (mixed). tDCS = transcranial direct current stimulation; MDD = major depressive disorder; TRD = treatment resistant depression; NR = not reported; NA = not applicable. <sup>1</sup>Two sham treatment groups were combined. <sup>2,3,4,7,8</sup>Numbers are based on the intention-to-treat sample. <sup>5</sup>Numbers based on participants of age  $\leq 70$  years. <sup>6</sup>Patients in sham group also received an oral placebo tablet. <sup>8</sup>Excluded “other psychiatric disorders.” <sup>b</sup>HDRS-21. <sup>c</sup>HDRS-17. <sup>d</sup>HDRS-24.

## BRAIN STIMULATION DEPRESSION META-ANALYSIS

Table 5

*Random-Effects Meta-Analysis of Response Rates*

| Treatment Modality | <i>k</i> | Odds Ratio  | 95% Confidence Interval |              | Q     | I <sup>2</sup> |
|--------------------|----------|-------------|-------------------------|--------------|-------|----------------|
| HF-L               | 32       | <b>3.75</b> | <b>2.44</b>             | <b>5.75</b>  | 41.96 | 26.1%          |
| LF-R               | 3        | <b>7.44</b> | <b>2.06</b>             | <b>26.83</b> | 1.59  | 0.0%           |
| LF-L               | 3        | 1.41        | 0.15                    | 12.88        | 0.14  | 0.0%           |
| BL                 | 6        | <b>3.68</b> | <b>1.66</b>             | <b>8.13</b>  | 3.45  | 0.0%           |
| cTBS*              | 1        | 1.63        | 0.23                    | 11.46        | -     | -              |
| iTBS               | 2        | <b>4.70</b> | <b>1.14</b>             | <b>19.38</b> | 0.02  | 0.0%           |
| bITBS              | 2        | 4.28        | 0.54                    | 34.27        | 2.91  | 65.7%          |
| dTMS               | 2        | <b>1.69</b> | <b>1.003</b>            | <b>2.85</b>  | 0.97  | 0.0%           |
| sTMS               | 2        | 2.71        | 0.44                    | 16.86        | 4.15  | 75.9%          |
| tDCS               | 9        | <b>4.17</b> | <b>2.25</b>             | <b>7.74</b>  | 10.83 | 26.2%          |

*Note.* HF-L = high-frequency, left-sided repetitive transcranial magnetic stimulation; LF-R = low-frequency, right-sided repetitive transcranial magnetic stimulation; LF-L = low-frequency, left-sided repetitive transcranial magnetic stimulation; BL = bilateral repetitive transcranial magnetic stimulation; dTMS = deep transcranial magnetic stimulation; cTBS = continuous theta burst stimulation; iTBS = intermittent theta burst stimulation; bITBS = bilateral theta burst stimulation; sTMS = synchronised transcranial magnetic stimulation; tDCS = transcranial magnetic stimulation. \*inverse variance method used.

## BRAIN STIMULATION DEPRESSION META-ANALYSIS

Table 6

### *Random-Effects Meta-Analysis of Remission Rates*

| Treatment Modality | <i>k</i> | Odds Ratio   | 95% Confidence Interval |              | Q     | I <sup>2</sup> |
|--------------------|----------|--------------|-------------------------|--------------|-------|----------------|
| HF-L               | 26       | <b>2.52</b>  | <b>1.62</b>             | <b>3.89</b>  | 25.35 | 1.4%           |
| LF-R               | 2        | <b>14.10</b> | <b>2.79</b>             | <b>71.42</b> | 0.50  | 0.0%           |
| LF-L               | 3        | 0.86         | 0.08                    | 9.11         | 0.03  | 0.0%           |
| BL                 | 5        | <b>3.05</b>  | <b>0.87</b>             | <b>10.67</b> | 4.48  | 10.7%          |
| cTBS               | -        | -            | -                       | -            | -     | -              |
| iTBS*              | 1        | 6.22         | 0.28                    | 136.90       | -     | -              |
| bITBS*             | 1        | 1.32         | 0.19                    | 9.02         | -     | -              |
| dTMS               | 2        | <b>2.24</b>  | <b>1.24</b>             | <b>4.06</b>  | 0.02  | 0.0%           |
| sTMS               | 2        | 2.51         | 0.23                    | 26.76        | 4.12  | 75.7%          |
| tDCS               | 8        | <b>2.88</b>  | <b>1.65</b>             | <b>5.04</b>  | 6.32  | 0.0%           |

*Note.* HF-L = high-frequency, left-sided repetitive transcranial magnetic stimulation; LF-R = low-frequency, right-sided repetitive transcranial magnetic stimulation; LF-L = low-frequency, left-sided repetitive transcranial magnetic stimulation; BL = bilateral repetitive transcranial magnetic stimulation; dTMS = deep transcranial magnetic stimulation; cTBS = continuous theta burst stimulation; iTBS = intermittent theta burst stimulation; bITBS = bilateral theta burst stimulation; sTMS = synchronised transcranial magnetic stimulation; tDCS = transcranial magnetic stimulation. \*inverse variance method used.

## BRAIN STIMULATION DEPRESSION META-ANALYSIS

Table 7

### *Random-Effects Meta-Analysis of Continuous Treatment Effects*

| Treatment Modality | <i>k</i> | <i>g</i>     | 95% Confidence Interval |              | Q      | I <sup>2</sup> |
|--------------------|----------|--------------|-------------------------|--------------|--------|----------------|
| HF-L               | 29       | <b>-0.72</b> | <b>-0.99</b>            | <b>-0.46</b> | 102.67 | 72.7%          |
| LF-R               | 2        | -0.77        | -1.64                   | 0.09         | 2.72   | 63.3%          |
| LF-L               | 2        | -0.33        | -1.18                   | 0.51         | 0.76   | 0.0%           |
| BL                 | 4        | -0.07        | -0.38                   | 0.25         | 0.25   | 0.0%           |
| cTBS               | -        | -            | -                       | -            | -      | -              |
| iTBS               | 1        | -0.44        | -1.02                   | 0.14         | 0.00   | -              |
| bITBS              | 1        | -0.03        | -0.65                   | 0.56         | -      | -              |
| dTMS               | 2        | <b>-0.29</b> | <b>-0.55</b>            | <b>-0.03</b> | 0.75   | 0.0%           |
| sTMS               | 2        | -0.55        | -1.13                   | 0.02         | 3.24   | 69.1%          |
| tDCS               | 7        | <b>-0.76</b> | <b>-1.31</b>            | <b>-0.21</b> | 33.68  | 82.2%          |

*Note.* HF-L = high-frequency, left-sided repetitive transcranial magnetic stimulation; LF-R = low-frequency, right-sided repetitive transcranial magnetic stimulation; LF-L = low-frequency, left-sided repetitive transcranial magnetic stimulation; BL = bilateral repetitive transcranial magnetic stimulation; dTMS = deep transcranial magnetic stimulation; cTBS = continuous theta burst stimulation; iTBS = intermittent theta burst stimulation; bITBS = bilateral theta burst stimulation; sTMS = synchronised transcranial magnetic stimulation; tDCS = transcranial direct current stimulation. \*inverse variance method used.

## BRAIN STIMULATION DEPRESSION META-ANALYSIS

Table 8

*Random-Effects Meta-Analysis of All-cause Discontinuation Rates*

| Treatment Modality | <i>k</i> | Odds Ratio | 95% Confidence Interval |       | Q     | I <sup>2</sup> |
|--------------------|----------|------------|-------------------------|-------|-------|----------------|
| HF-L               | 35       | 0.86       | 0.60                    | 1.23  | 14.58 | 0.0%           |
| LF-R               | 3        | 0.48       | 0.12                    | 1.99  | 0.35  | 0.0%           |
| LF-L               | 3        | 0.84       | 0.11                    | 6.73  | 0.71  | 0.0%           |
| BL                 | 6        | 0.90       | 0.33                    | 2.43  | 3.03  | 0.0%           |
| cTBS*              | 1        | 1.00       | 0.02                    | 53.66 | -     | -              |
| iTBS               | 2        | 1.06       | 0.06                    | 17.66 | 0.00  | 0.0%           |
| BLTBS              | 2        | 0.47       | 0.04                    | 5.88  | 0.23  | 0.0%           |
| dTMS               | 2        | 1.03       | 0.32                    | 3.36  | 2.10  | 52.3%          |
| sTMS               | 2        | 0.72       | 0.36                    | 1.44  | 0.32  | 0.0%           |
| tDCS               | 10       | 1.34       | 0.71                    | 2.52  | 6.66  | 0.0%           |

*Note.* HF-L = high-frequency, left-sided repetitive transcranial magnetic stimulation; LF-R = low-frequency, right-sided repetitive transcranial magnetic stimulation; LF-L = low-frequency, left-sided repetitive transcranial magnetic stimulation; BL = bilateral repetitive transcranial magnetic stimulation; dTMS = deep transcranial magnetic stimulation; cTBS = continuous theta burst stimulation; iTBS = intermittent theta burst stimulation; bITBS = bilateral theta burst stimulation; sTMS = synchronised transcranial magnetic stimulation; tDCS = transcranial direct current stimulation. \*inverse variance method used.



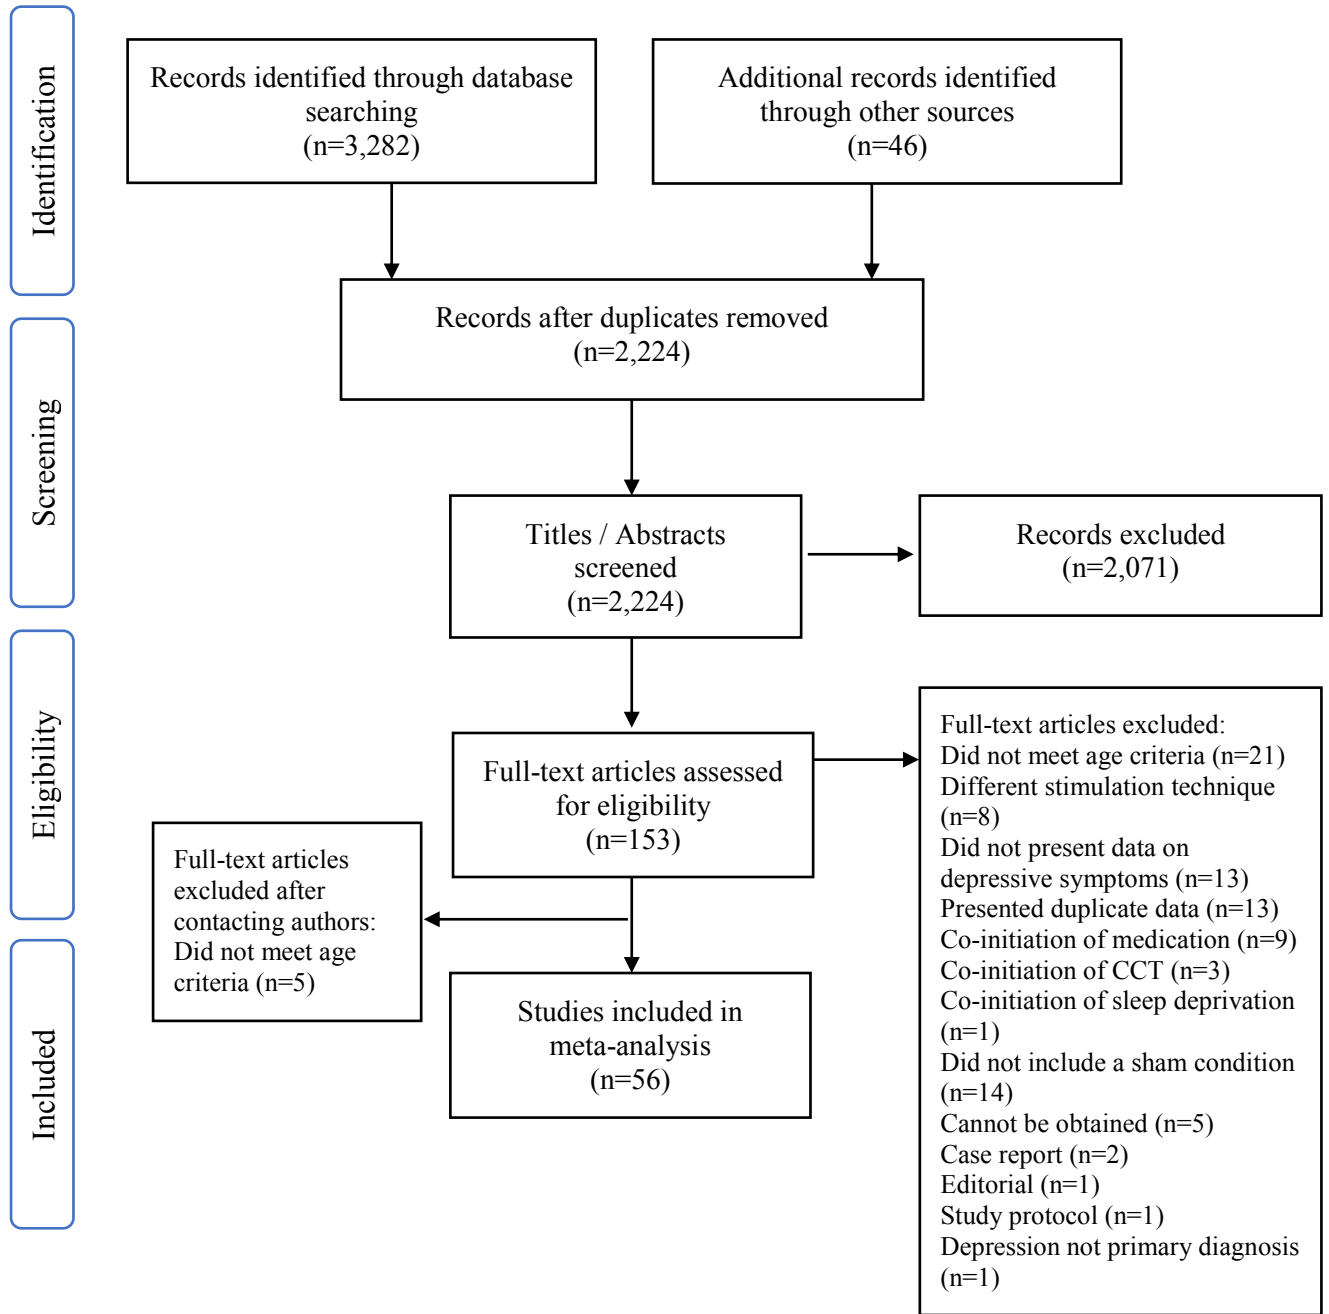

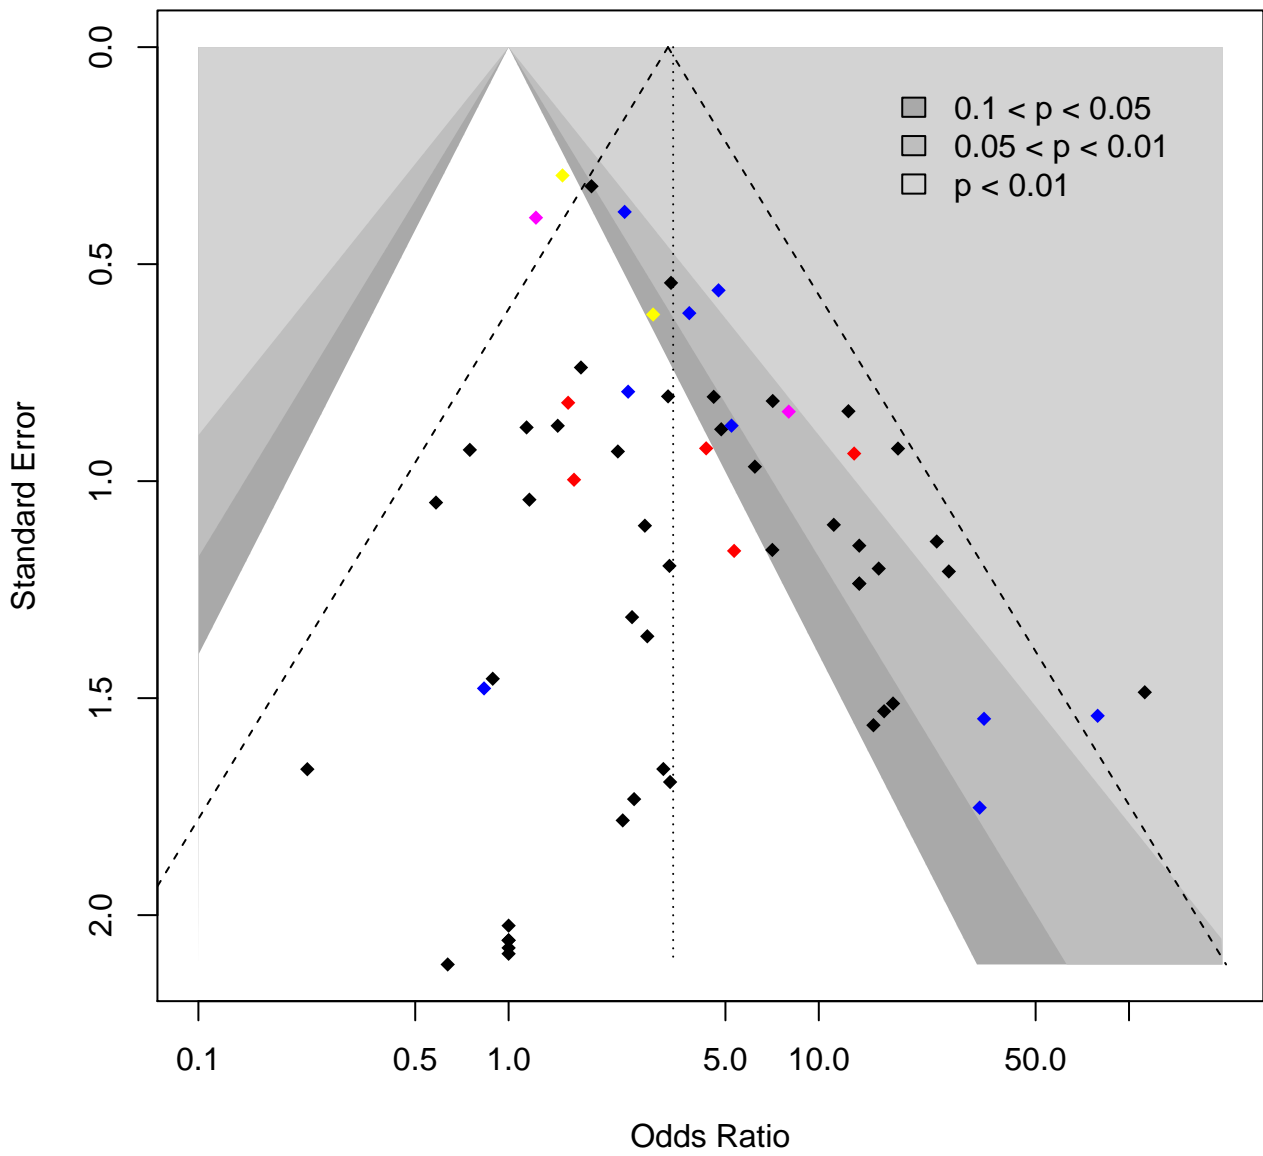

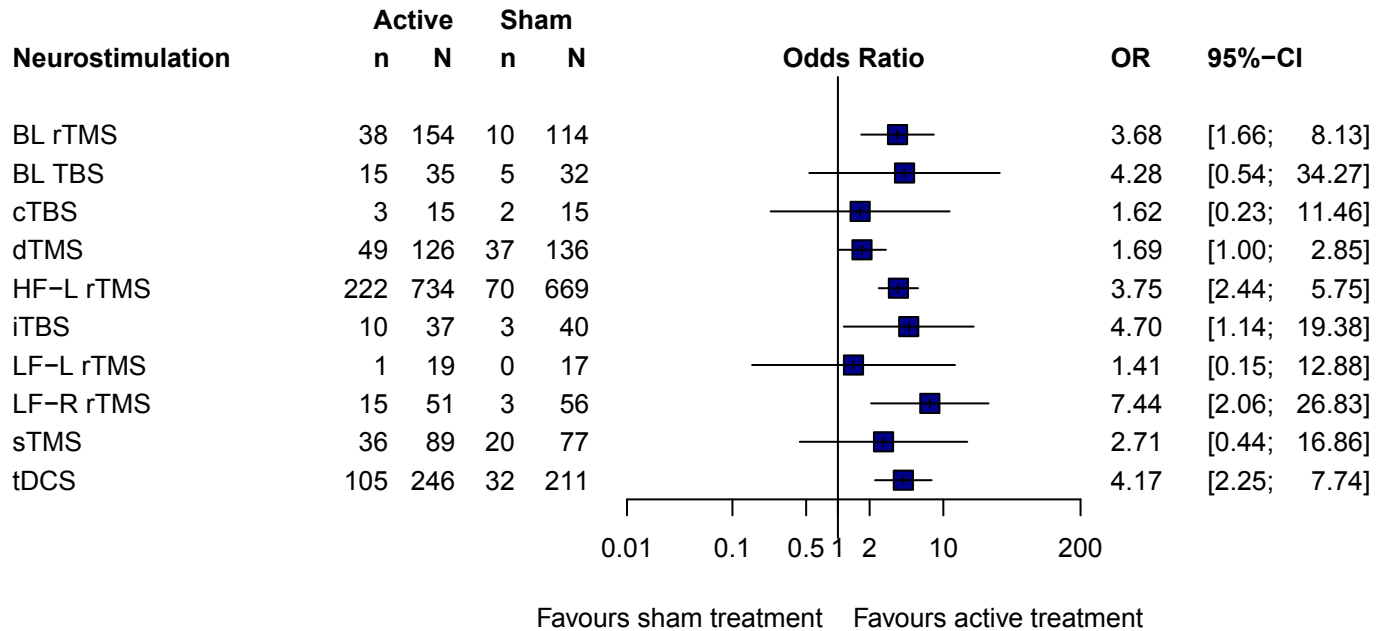

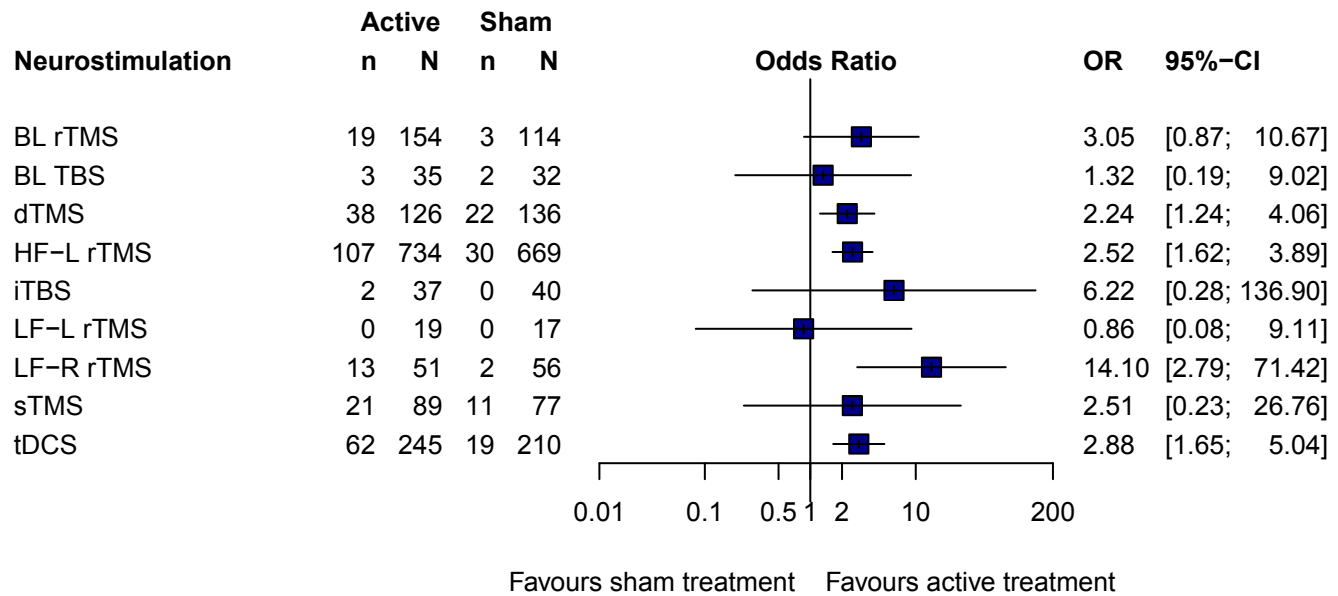

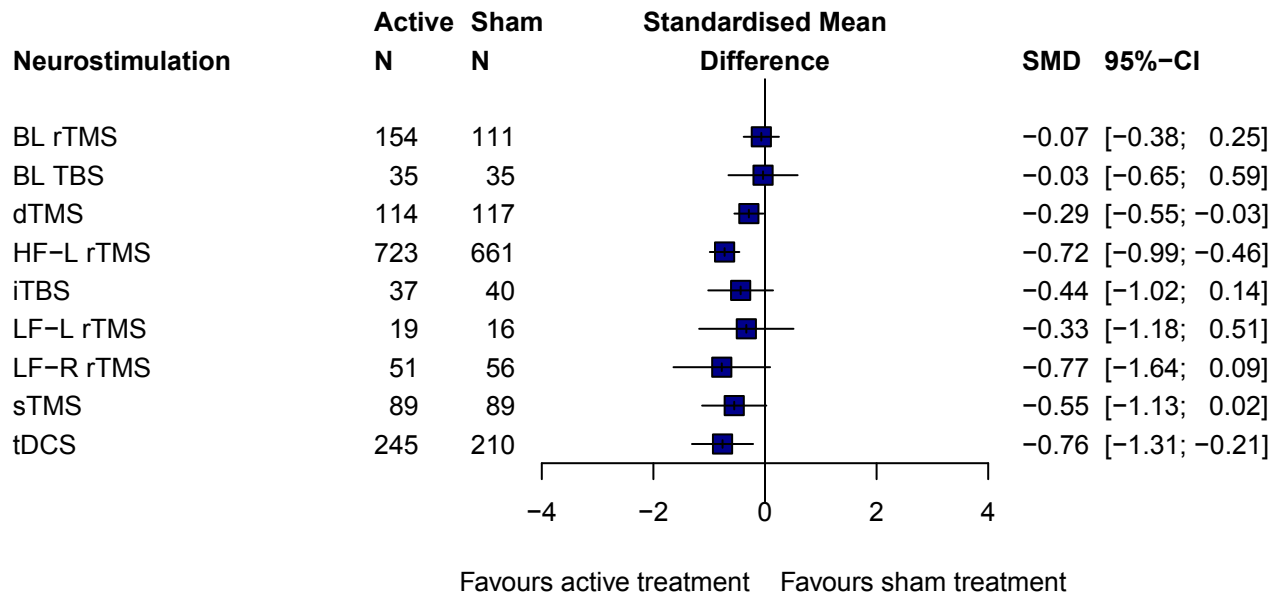

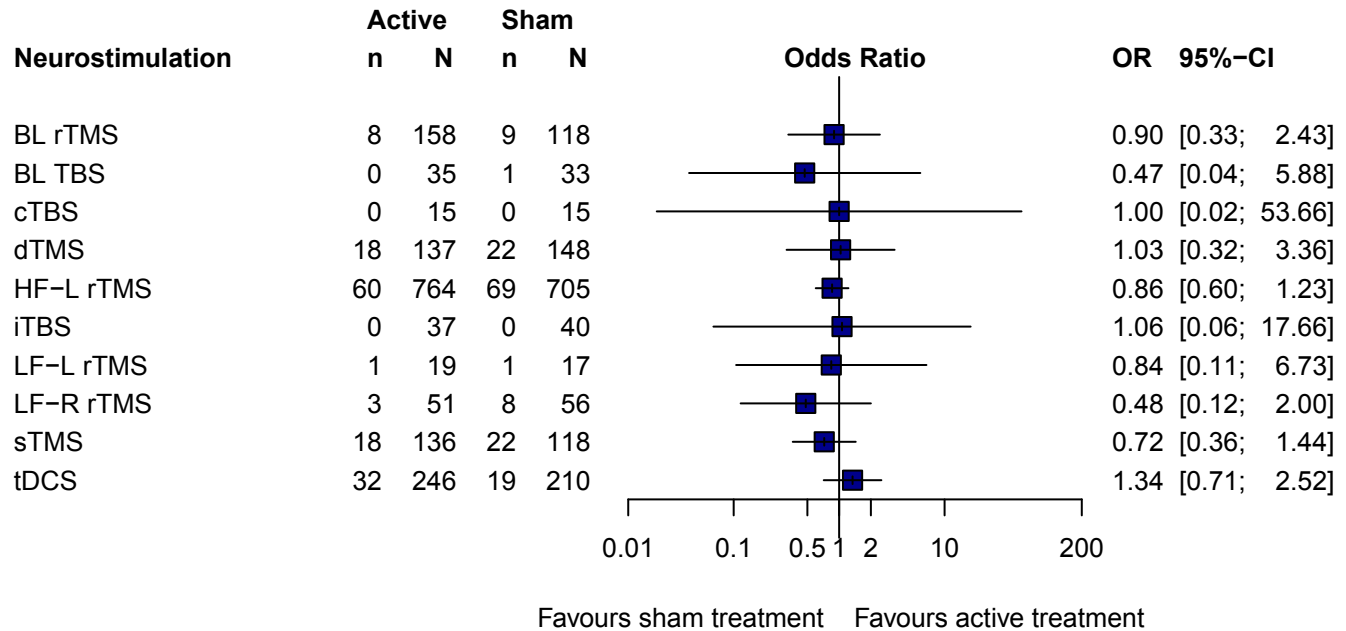

Source: https://www.biorxiv.org/content/10.1101/287656v2.full.pdf
